# Supplementary material for: Resilience does matter: evidence from a 10-year cohort record linkage study
Source: PubMed Central journal article supplement — BMJ Open. 2014 Jan 11;4(1):e003917. doi: 10.1136/bmjopen-2013-003917 (PMC3902361; doi:10.1136/bmjopen-2013-003917), 2014-01-11
Supplement: bmjopen-2013-003917.draft_revisions.pdf [file bmjopen-2013-003917.draft_revisions.pdf]

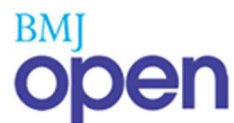

**Resilience does matter: evidence from a ten-year cohort record linkage study**

|                                 |                                                                                                                                                                                                                                   |
|---------------------------------|-----------------------------------------------------------------------------------------------------------------------------------------------------------------------------------------------------------------------------------|
| Journal:                        | <i>BMJ Open</i>                                                                                                                                                                                                                   |
| Manuscript ID:                  | bmjopen-2013-003917                                                                                                                                                                                                               |
| Article Type:                   | Research                                                                                                                                                                                                                          |
| Date Submitted by the Author:   | 29-Aug-2013                                                                                                                                                                                                                       |
| Complete List of Authors:       | Elliott, Alison; University of Aberdeen, Academic Primary Care<br>Burton, Christopher; University of Aberdeen, Academic Primary Care<br>Hannaford, Phil; University of Aberdeen, Academic Primary Care;<br>University of Aberdeen |
| <b>Primary Subject Heading</b>: | Health services research                                                                                                                                                                                                          |
| Secondary Subject Heading:      | General practice / Family practice, Epidemiology                                                                                                                                                                                  |
| Keywords:                       | EPIDEMIOLOGY, PAIN MANAGEMENT, PRIMARY CARE                                                                                                                                                                                       |
|                                 |                                                                                                                                                                                                                                   |

SCHOLARONE™  
Manuscripts

Peer review only

1  
2  
3 **Resilience does matter: evidence from a ten-year cohort record linkage study**  
4

5 Alison M Elliott, Christopher D Burton, Philip C Hannaford  
6  
7

8  
9  
10 Alison M Elliott

11  
12 Senior Research Fellow

13  
14 Centre of Academic Primary Care, Division of Applied Health Sciences, University of  
15 Aberdeen, Polwarth Building, Foresterhill, Aberdeen, AB25 2ZD.  
16  
17

18  
19  
20  
21 Christopher D Burton

22  
23 Clinical Senior Lecturer

24  
25 Centre of Academic Primary Care, Division of Applied Health Sciences, University of  
26 Aberdeen, Polwarth Building, Foresterhill, Aberdeen, AB25 2ZD.  
27  
28

29  
30  
31  
32 Philip C Hannaford

33  
34 Vice Principal (Research and Knowledge Exchange)

35  
36 Centre of Academic Primary Care, Division of Applied Health Sciences, University of  
37 Aberdeen, Polwarth Building, Foresterhill, Aberdeen, AB25 2ZD.  
38  
39  
40  
41

42  
43  
44  
45 Correspondence to:

46  
47 Alison M Elliott

48  
49 Centre of Academic Primary Care, Division of Applied Health Sciences, University of  
50 Aberdeen, Polwarth Building, Foresterhill, Aberdeen, AB25 2ZD.  
51  
52

53  
54 a.m.elliott@abdn.ac.uk  
55  
56  
57  
58  
59  
60

## ABSTRACT

**Objectives** To examine ten-year mortality and hospital use among individuals categorised as resilient and vulnerable to the impact of chronic pain.

**Design** A cohort record linkage study.

**Setting** Grampian, Scotland

**Participants** 5858 individuals from the Grampian Pain Cohort, established in 1996, were linked, by probability matching, with national routinely collected datasets.

**Main outcome measures** Hazard ratios for subsequent ten-year mortality and odds ratios/incidence rate ratios for subsequent ten-year hospital use, each with adjustment for potential confounding variables.

**Results** 36.5% of those with high pain intensity reported low pain-related disability (categorised resilient) and 7.1% of those reporting low pain intensity reported high pain-related disability (categorised vulnerable). Sex, age, housing, employment and long-term limiting illness were independently associated with being vulnerable or resilient. After adjustment for these variables, individuals in the resilient group were 25% less likely to die within 10 years of the survey compared with non-resilient individuals: Hazard Ratio (HR) 0.75, 95% Confidence Interval (CI) 0.62 to 0.91 and vulnerable individuals were 45% more likely to die than non-vulnerable individuals: HR 1.45, 95%CI 1.01 to 2.11. Resilient

1  
2  
3 individuals were less likely to have had an outpatient or day-case visit for anaesthetics: Odds  
4  
5 Ratio (OR) 0.46, 95% CI 0.27 to 0.79, but no other clinical specialities. Vulnerable individuals  
6  
7 were significantly less likely to have had any outpatient or day case visit (OR 0.43, 0.25 to  
8  
9 0.75); but more likely to have had a psychiatric visit (OR 1.96, 1.06 to 3.61). No significant  
10  
11 differences in likelihood of any inpatient visits were found.  
12  
13

14  
15  
16  
17 **Conclusions** Resilient individuals have better ten-year survival than non-resilient individuals  
18  
19 indicating that resilience is a phenomenon worth researching. Further research is needed  
20  
21 to explore who is likely to become resilient, why and how, as well as to tease out the  
22  
23 internal and external factors that influence resilience.  
24  
25  
26  
27  
28  
29  
30  
31  
32  
33  
34  
35  
36  
37  
38  
39  
40  
41  
42  
43  
44  
45  
46  
47  
48  
49  
50  
51  
52  
53  
54  
55  
56  
57  
58  
59  
60

## ARTICLE SUMMARY

### Article focus

- Little is known about the long term outcomes of resilient and vulnerable individuals.
- We examined long-term hospital use and mortality among those categorised as resilient and those categorised as vulnerable to the impact of chronic pain.
- Our hypotheses were that individual's categorized as resilient would fare better than a comparison group with a similar level of chronic pain, and individuals categorised as vulnerable would do worse.

### Key messages

- Resilient individuals were 25% less likely to die within 10 years than non-resilient individuals and vulnerable individuals were 45% more likely to die than non-vulnerable individuals.
- There were few differences in the use of hospital services over the ten years between the groups.
- Our findings suggest that the concept of resilience is a phenomenon worth researching. Important gains may be made in understanding who is likely to become resilient, why and how.

### Strengths and limitations of this study

- This is the first study to examine the long term effects of resilience or vulnerability to chronic pain in terms of survival and hospital use.

- A major strength of our study was its community base, meaning results from this study are more likely to be representative of people living in the community than those from studies using samples from healthcare settings, such as pain clinics.
- The prospective nature of the study meant that pain status was ascertained before outcome was measured, avoiding recall bias.
- We did not use a formal resilience measurement scale. Instead we categorised individuals on the basis of their scores on the intensity and disability sub-scales of a chronic pain measure.
- Although we were able to adjust for several socio-demographic variables in the analysis, some other potentially important factors were not fully available in the dataset (e.g. smoking).

## INTRODUCTION

Chronic pain is common.<sup>1-3</sup> It has wide reaching physical, psychological, and social consequences<sup>3-7</sup> and places a heavy burden on individuals, society and healthcare services.<sup>8, 9</sup> While much clinical practice and research focuses on those who do badly with a condition ('vulnerable' individuals), interest is growing in understanding the characteristics and experiences of those who appear to do well ('resilient' individuals).<sup>10 11</sup> Recent studies have examined resilience to physical illness,<sup>12</sup> menopausal symptoms<sup>13</sup> and specific conditions such as diabetes,<sup>14</sup> epilepsy,<sup>15</sup> asthma<sup>16</sup> and chronic pain.<sup>17-22</sup> These studies have provided useful insights into the short-term importance of resilience. They have also indicated some of the factors accounting for why certain people appear to cope better with their condition than others, such as socio-economic factors, individual personality traits, psychological factors, spirituality, social support and general health. Little is known, however, about the long term outcomes of resilient and vulnerable individuals. Such information is needed to understand the clinical and research relevance of trying to identify both sets of individuals.

In this paper we linked information about respondents to a large community-based survey with routinely collected health service data to examine long-term (ten year) hospital use and mortality among those categorised as resilient and vulnerable to the impact of chronic pain. Our hypothesis was that those categorized as resilient would fare better than a comparison group with a similar level of chronic pain, and those categorised as vulnerable would do worse.

## METHODS

### *Grampian cohort*

The Grampian cohort, established in July 1996,<sup>2</sup> comprised 6,940 adults (aged 25+ years) recruited from 29 practices across Grampian, North East Scotland. These included 3,605 individuals recruited through random selection from everyone registered with the practice (essentially a general population sample) and 3,335 individuals recruited through random selection based on those receiving repeat prescriptions for analgesic use. Full details of the survey have been reported previously.<sup>23</sup> Briefly, participants were sent a postal questionnaire which included questions about the presence and severity of chronic pain and a range of items regarding health and socio-demographic details. The corrected response rate was 84.3% after two reminders. Study respondents were broadly representative of the Grampian population.<sup>7</sup>

### *Chronic pain status*

Individuals with chronic pain were identified by affirmative answers to two questions based on the International Study for the Association of Pain (IASP) definition<sup>24</sup>: (i) Are you currently troubled by pain or discomfort, either all the time or on and off? (ii) Have you had this pain or discomfort for more than three months?

### *Pain severity*

Chronic pain severity was assessed using the Chronic Pain Grade (CPG) questionnaire.<sup>25</sup> This is a seven-item instrument that measures severity in two dimensions: intensity sub-scale (three visual analogue scale items: current, worst and average pain intensity in the last six months) and disability sub-scale (three visual analogue scale items: interference with daily



1  
2  
3 activities, social activities and daily work in the last six months; and one item on number of  
4  
5 days off work). A score is generated from the three visual analogue scale items for each  
6  
7 sub-scale, from 0 (best possible pain state) to 100 (worst possible pain state). These scores  
8  
9 and the item on number of days off work are then used to classify chronic pain into four  
10  
11 hierarchical grades, from Grade I (low disability-low intensity pain) to Grade IV (high  
12  
13 disability-severely limiting pain). The CPG has been shown to be valid and reliable for use in  
14  
15 a self-completion postal questionnaire in the UK general population.<sup>26</sup> Only those who gave  
16  
17 affirmative answers to both of the chronic pain questions were asked to complete the CPG  
18  
19 questionnaire.  
20  
21  
22  
23  
24  
25  
26

#### 27 *General health & socio-economic details*

28  
29 The questionnaire included several questions about general health. For this paper we used  
30  
31 results from a question on the presence or absence of a long-term limiting illness drawn  
32  
33 from the National Census (<http://www.gro-scotland.gov.uk/files/hseform.pdf>). The  
34  
35 questionnaire also included items regarding sex, age, marital status, education, housing,  
36  
37 social support and employment status.  
38  
39  
40  
41  
42

#### 43 *National routinely collected datasets*

44  
45 In Scotland, routinely collected health information and statistics are collated and stored in a  
46  
47 national database by the Information Services Division (ISD), NHS Scotland  
48  
49 (<http://www.isdscotland.org/isd/1.html>). These routinely collected national datasets can be  
50  
51 linked with existing cohorts where adequate personal details are available. An advantage of  
52  
53 using national datasets is the ability to follow up members of a cohort who remain in  
54  
55 Scotland but who move away from their recruitment location. Data (from 1996 to 2006  
56  
57  
58  
59  
60

1  
2  
3 inclusive) about respondents to the Grampian survey was requested from four of the  
4  
5 national datasets: the General Register Office death records; SMR00- first attendances at  
6  
7 outpatient clinics; SMR01- inpatient and day case episodes in general and acute wards of  
8  
9 hospitals; and SMR04- inpatient and day cases in psychiatric units and hospitals.  
10  
11

### 12 13 14 ***Record linkage***

15  
16  
17 A copy of the Grampian cohort dataset was forwarded to the Medical Records Linkage Team  
18  
19 at ISD who undertook the linkage. ISD-held data were linked using standard probability  
20  
21 matching procedures based on common patient identifiable fields. The new linked dataset  
22  
23 was stripped of patient identifiers by ISD and returned to the research team in an  
24  
25 anonymised format. This approach enabled detailed analysis of the linked data, whilst  
26  
27 maintaining patient confidentiality. The study was approved by the Privacy Advisory  
28  
29 Committee of NHS National Services, Scotland. Grampian Research Ethics Committee  
30  
31 approved the original questionnaire survey and subsequently confirmed that ethical  
32  
33 approval was not required for the new linkage since no information was being collected  
34  
35 from participants and the linked dataset was anonymised.  
36  
37  
38  
39  
40  
41  
42

### 43 ***Identification of resilient and vulnerable individuals***

44  
45 Individuals were categorised into one of four groups based on their scores on the intensity  
46  
47 and disability sub-scales of the CPG. Individuals with low pain-related disability (<50/100)  
48  
49 despite high pain intensity ( $\geq 50/100$ ) were categorised as 'resilient'; these individuals were  
50  
51 compared with 'non-resilient' individuals who reported both high pain-related disability  
52  
53 ( $\geq 50/100$ ) and high intensity pain ( $\geq 50/100$ ). Individuals with high pain-related disability  
54  
55 ( $\geq 50/100$ ) in spite of low intensity pain (<50/100) were categorised as 'vulnerable'; these  
56  
57  
58  
59  
60

1  
2  
3 individuals were compared with 'non-vulnerable' individuals who reported low intensity  
4  
5 pain (<50/100) and low pain-related disability (<50/100).  
6  
7

### 8 9 10 ***Grouping of hospital-related data***

11  
12 Routine data were available for 42 different clinical specialties and included the number of  
13  
14 visits (as out-patient or day-case) and the total number of days spent as an in-patient, for  
15  
16 each specialty. In order to maximise our statistical power we pooled the different visit types  
17  
18 and collapsed the data into six categories: 1) medicine (general medicine, geriatric medicine,  
19  
20 all major medical specialties except rheumatology), 2) surgery (general surgery, all surgical  
21  
22 specialties e.g. ENT, gynaecology, but excluding orthopaedic surgery); 3) musculo-skeletal  
23  
24 (rheumatology and orthopaedic surgery); 4) anaesthetics (as pain clinics are coded by this  
25  
26 specialty); 5) oncology (including palliative care and haematology); and 6) psychiatry. Full  
27  
28 details of the categorisation are in appendix 1. Information about use of Accident &  
29  
30 Emergency services, which are largely accessed in an unscheduled way, was not available  
31  
32 since the datasets requested relate to scheduled care.  
33  
34  
35  
36  
37  
38  
39  
40

### 41 ***Statistical analysis***

42  
43 Data were analysed using SPSS for Windows (version 19) and R 2.15.2. Descriptive statistics  
44  
45 examined the proportion of people categorised as resilient or vulnerable. Binary logistic  
46  
47 regression was then used to examine the demographic, socio-economic and health factors  
48  
49 associated with being in each group. In each case resilient individuals were compared with  
50  
51 those in the non-resilient comparison group and those in the vulnerable group were  
52  
53 compared with those in the non-vulnerable comparison group.  
54  
55  
56  
57  
58  
59  
60

1  
2  
3 Cox regression survival analysis was conducted to obtain unadjusted and adjusted hazard  
4 ratios (HR) with 95% confidence intervals (CI) for all-cause mortality and cause of death.  
5  
6 Adjustments were made for factors independently associated with being vulnerable or  
7  
8 resilient on multivariate analysis. The assumption of constant time dependent covariates  
9  
10 was checked for each model and found to hold.  
11  
12  
13

14  
15  
16  
17 Hospital use was analysed using a two stage procedure to test for differences in both binary  
18 (any visits or none) and continuous (number of visits in those having at least one visit)  
19 components. In view of over-dispersion in the data we used negative binomial regression  
20 for the continuous component with logistic regression for the binary. Results were  
21 expressed as odds ratios (OR) for the binary and incidence rate ratios (IRR) for the  
22 continuous component.  
23  
24  
25  
26  
27  
28  
29  
30  
31  
32

33  
34 Sensitivity analyses were conducted to explore how our findings changed if: i) pain-related  
35 disability was measured in a different way; and ii) we adjusted for additional factors with  
36 incomplete data.  
37  
38  
39  
40  
41  
42

## 43 RESULTS

44  
45 ISD managed to link 5,858 (84.4%) of the 6,940 individuals in the original Grampian cohort.  
46  
47 The characteristics of the linked cohort were very similar to the original complete cohort  
48 with no significant differences in demographic, socio-economic or pain factors. A total of  
49 4139 (70.7%) of those in the linked cohort had chronic pain at baseline of which 3739  
50 (90.3%) had detailed information on pain intensity and disability and were included in  
51 subsequent analyses (see Figure 1).  
52  
53  
54  
55  
56  
57  
58  
59  
60

### ***Resilience and vulnerability***

Of the 2242 individuals reporting high intensity pain, 819 (36.5%) reported low pain-related disability and were categorised as resilient, while 1423 (63.5%) reported high pain-related disability and were categorised as non-resilient. Among the 1497 individuals reporting low intensity pain, 107 (7.1%) had high pain-related disability and so were categorised as vulnerable, compared with 1390 (92.9%) who reported low pain-related disability and were categorised as non-vulnerable.

### ***Factors associated with being resilient and vulnerable***

Table 1 presents the measured demographic, socio-economic and health factors associated with being in the resilient and vulnerable groups. On univariate analysis, individuals were *less* likely to be classified as resilient to their chronic pain if they were female, older, no longer married, had less than an university education, lived in rented accommodation, lived with no other adults, were not working and had a long-term limiting illness. Conversely, individuals were *more* likely to be classified as vulnerable to their chronic pain if they lived in rented council accommodation, lived with no other adults, were unable to work and had a long-term limiting illness. On multivariate analysis: sex, age, housing, employment and long-term limiting illness were identified as the factors independently associated with being vulnerable or resilient and were adjusted for in subsequent analyses.

### ***Mortality***

During the ten-year follow-up period, 21.1% of the resilient group and 31.9% of the non-resilient group died (Table 2). In comparison, 32.7% of the vulnerable group and 20.9% of

1  
2  
3 the non-vulnerable group died. The main causes of death were broadly similar in each  
4  
5 group (Table 2).  
6  
7

8  
9  
10 Kaplan Meier survival plots (Figure 2) show a progressive divergence over time between  
11  
12 resilient and non-resilient groups, and between vulnerable and non-vulnerable groups, with  
13  
14 no discontinuity. Table 2 details the results of the Cox proportional hazards regression  
15  
16 (expressed as hazard ratios). After adjusting for sex, age, housing, employment  
17  
18 (independently associated socio-demographic factors), and long term limiting illness  
19  
20 individuals in the resilient group were 25% less likely to die within 10 years of the survey  
21  
22 compared with non-resilient individuals: HR 0.75, 95% CI 0.62 to 0.91. A statistically  
23  
24 significant reduction in death from cancer among the resilient group also remained (HR  
25  
26 0.64, 0.44 to 0.93) after adjustment. After adjustment, vulnerable individuals were more  
27  
28 likely to die over the ten year period than non-vulnerable individuals: HR 1.45, 1.01 to 2.11  
29  
30 and vulnerable individuals were significantly more likely to die from circulatory diseases  
31  
32 than those in the non-vulnerable group (HR 1.91, 1.08 to 3.38).  
33  
34  
35  
36  
37  
38  
39

#### 40 ***Hospital use***

41  
42 Most individuals in each group used a hospital service at least once during the ten year  
43  
44 follow up period. Outpatient or day-case attendance occurred in 720 (87.9%) of resilient  
45  
46 individuals, 1211 (85.1%) of non-resilient individuals, 86 (80.4%) vulnerable individuals and  
47  
48 1238 (89.1%) of the non-vulnerable individuals. At least one inpatient admission occurred in  
49  
50 514 (62.8%) resilient individuals, 1017 (71.5%) non-resilient individuals, 82 (76.6%)  
51  
52 vulnerable individuals and 865 (62.2%) non-vulnerable individuals.  
53  
54  
55  
56  
57  
58  
59  
60

1  
2  
3 Details of hospital use over the ten-year follow-up period are presented in table 3  
4  
5 (comparing resilient and non-resilient groups) and table 4 (comparing vulnerable and non-  
6  
7 vulnerable groups). Table 3 shows that compared with non-resilient individuals, resilient  
8  
9 individuals with chronic pain were less likely to have had an outpatient or day-case visit for  
10  
11 anaesthetics, the specialty which hosts pain clinics: adjusted OR 0.46, 0.27 to 0.79. There  
12  
13 were no other statistically significant differences in visits for other clinical specialities. There  
14  
15 were no statistically significant differences in the number of outpatient or day case visits.  
16  
17 Nor were there any statistically significant differences in inpatient days between resilient  
18  
19 and non-resilient groups. Compared with non-vulnerable individuals, those in the  
20  
21 vulnerable group were significantly less likely to have any outpatient or day case visits  
22  
23 (Table 4: adjusted OR 0.43, 0.25 to 0.75); and more likely to have an outpatient or day case  
24  
25 psychiatric visit (OR 1.96, 1.06 to 3.61). There were no statistically significant differences in  
26  
27 the number of outpatient or day case visits. No differences were observed between  
28  
29 vulnerable and non-vulnerable groups for likelihood of any inpatient visits, or total number  
30  
31 of inpatient days (except for anaesthetics). However, the very small number of inpatient  
32  
33 admissions in the vulnerable group indicates that any inference from these should be  
34  
35 viewed with caution.  
36  
37  
38  
39  
40  
41  
42  
43  
44

## 45 **DISCUSSION**

46  
47 This is the first study to examine the long term effects of resilience or vulnerability to  
48  
49 chronic pain in terms of survival and hospital use. We found that resilience to chronic pain  
50  
51 (as defined by low disability in spite of high intensity pain) was associated with a  
52  
53 significantly reduced risk of death over the subsequent ten years. With the exception of  
54  
55 pain services, resilient individuals made the same use of specialist services as the non-  
56  
57  
58  
59  
60

1  
2  
3 resilient comparator group. We also found that individuals classified as vulnerable to their  
4  
5 chronic pain had poorer survival than those in the non-vulnerable comparison group. The  
6  
7 few differences between vulnerable and non-vulnerable individuals in their use of hospital  
8  
9 services related mainly to psychiatric and anaesthetic services.  
10  
11

12  
13  
14 A major strength of our study was its community base. Results from this study are more  
15  
16 likely to be representative of people living in the community than those from studies using  
17  
18 samples from healthcare settings, such as pain clinics. The prospective nature of the study  
19  
20 meant that pain status was ascertained before outcome was measured, avoiding recall bias.  
21  
22 Furthermore, long-term outcomes were available for analysis. We did not use a formal  
23  
24 resilience measurement scale.<sup>27</sup> Our analyses assume that self reported pain intensity and  
25  
26 disability due to pain correctly differentiated respondents into those resilient or vulnerable  
27  
28 to the effects of chronic pain. Individuals were categorised based on their scores on the  
29  
30 intensity and disability sub-scales of the CPG. Use of the two sub-scales allowed us to use a  
31  
32 measure of disability that was directly related to pain, rather than use of a generic measure  
33  
34 of health that could have been influenced by other conditions. This approach meant that  
35  
36 the two sub-scales were directly comparable. Since we did not use the 'days off work'  
37  
38 question in the CPG questionnaire normally used to grade people, a sensitivity analysis was  
39  
40 undertaken to examine the effect of including this additional question. Analysis showed  
41  
42 that the findings did not materially change, with the same overall pattern of results seen  
43  
44 (data not shown). A strength of our approach is that it moves away from groupings based  
45  
46 on help seeking behaviour which is known to be a poor marker of actual functioning.<sup>28 29</sup>  
47  
48 Consulting a health care professional may not always identify individuals who are "resilient"  
49  
50 or "vulnerable" to their symptoms.  
51  
52  
53  
54  
55  
56  
57  
58  
59  
60



1  
2  
3  
4  
5 Resilience and vulnerability were associated with several socio-demographic variables and  
6  
7 we were able to adjust for these in the analysis. Some other potentially important factors  
8  
9 were not fully available in the dataset, but were examined in an additional set of sensitivity  
10  
11 analyses to examine the effects of smoking and mental health in relation to survival. Data on  
12  
13 cigarette smoking was available from a follow up survey (conducted four years after  
14  
15 baseline) for 1572 of the 3739 individuals. There were no specific measures of mental  
16  
17 health in the original survey although it did include the SF-36 measure of health related  
18  
19 quality of life which includes a Mental Health component. Adding both of these variables in  
20  
21 turn into the survival models did not change the hazard ratios substantially, although  
22  
23 incomplete data led to wider confidence intervals. While we found few differences in  
24  
25 specialist care use between groups, our analyses did not allow for different survival between  
26  
27 groups, which meant that resilient individuals tended to have a longer period of time in  
28  
29 which to receive specialist treatment than non-resilient individuals; and vulnerable  
30  
31 individuals less time than non-vulnerable individuals. These patterns of survivorship are  
32  
33 likely to exaggerate differences between groups, rather than diminish them.  
34  
35  
36  
37  
38  
39  
40  
41  
42

43 There is growing interest in the phenomenon of resilience in a range of health and social  
44  
45 sciences. While hard to define,<sup>11 30 31</sup> it has been suggested that resilience describes  
46  
47 something more than either hardiness (for instance not becoming unwell) or coping. Instead  
48  
49 it implies both experiencing adversity (illness) and adapting in order to bounce back and  
50  
51 thrive, sometimes in changed ways.<sup>32</sup> Our finding of generally comparable healthcare use  
52  
53 between resilient and non-resilient individuals suggests that resilience in our study was not  
54  
55 simply measuring hardiness.  
56  
57  
58  
59  
60

1  
2  
3  
4  
5  
6  
7  
8  
9  
10  
11  
12  
13  
14  
15  
16  
17  
18  
19  
20  
21  
22  
23  
24  
25  
26  
27  
28  
29  
30  
31  
32  
33  
34  
35  
36  
37  
38  
39  
40  
41  
42  
43  
44  
45  
46  
47  
48  
49  
50  
51  
52  
53  
54  
55  
56  
57  
58  
59  
60

Whatever resilience is, and however it is measured, our finding of better survival among resilient people with chronic pain, suggests that resilience is a phenomenon worth researching. It was noteworthy that a larger proportion (36.5%) of individuals were resilient than vulnerable (7.1%). This suggests that important gains may be made in understanding who is likely to become resilient, why and how. Further research is now needed to tease out both the internal (e.g. personality traits, self-efficacy) and external (e.g. social support) factors that influence an individual's resilience. Of particular importance will be the identification of modifiable factors that could be used to help build additional resilience in individuals who could benefit.

## References

1. Verhaak PF, Kerssens JJ, Dekker J, Sorbi MJ, Bensing JM. Prevalence of chronic benign pain disorder among adults: a review of the literature. *Pain* 1998; 77: 231–239.
2. Elliott AM, Smith BH, Penny KI, Smith WC, Chambers WA. The epidemiology of chronic pain in the community. *Lancet* 1999; 354: 1248-1252.
3. Breivik H, Collett B, Ventafridda V, Cohen R, Gallacher D. Survey of chronic pain in Europe: prevalence, impact on daily life, and treatment. *European Journal of Pain* 2006; 10: 287-333.
4. Magni G, Marchetti M, Moreschi C, Merskey H, Luchini SR. Chronic musculoskeletal pain and depressive symptoms in the National Health and Nutrition Examination I. Epidemiologic follow-up study. *Pain* 1993; 53: 163-168
5. Becker N, Thomsen AB, Olsen AK, Sjogren P, Bech P, Eriksen J. Pain epidemiology and health related quality of life in chronic non-malignant pain patients referred to a Danish multidisciplinary center. *Pain* 1997; 73: 393-400.
6. Gureje O, Von Korff M, Simon GE, Gater R. Persistent pain and well-being. A World Health Organization study in primary care. *Journal of the American Medical Association* 1998; 280: 147-151.

- 1  
2  
3 7. Smith BH, Elliott AM, Chambers WA, Smith WC, Hannaford PC, Penny K. The impact  
4  
5 of chronic pain in the community. *Family Practice* 2001; 18: 292-299.  
6  
7  
8  
9
- 10 8. Latham J and Davis BD. The socio-economic impact of chronic pain. *Disability and*  
11  
12 *Rehabilitation* 1994; 16: 39-44.  
13  
14  
15  
16
- 17 9. Maniadiakis N and Gray A. The economic burden of back pain in the UK. *Pain* 2000;  
18  
19 84: 95-103.  
20  
21  
22  
23
- 24 10. Carver CS. Resilience and thriving: issues, models and linkages. *Journal of Social*  
25  
26 *Issues* 1998; 54: 245-266.  
27  
28  
29  
30
- 31 11. Windle G. What is resilience? A review and concept analysis. *Reviews in Clinical*  
32  
33 *Gerontology* 2011; 21: 152-169.  
34  
35  
36  
37
- 38 12. Stewart DE, Yuen T. A systematic review of resilience in the physically ill.  
39  
40 *Psychosomatics* 2011 52: 199-209.  
41  
42  
43  
44
- 45 13. Duffy OK, Iversen L, Aucott L, Hannaford PC. Factors associated with resilience or  
46  
47 vulnerability to hot flushes and night sweats during the menopausal transition'.  
48  
49 *Menopause* 2012; 20(4) doi:10.1097/gme.0b013e31827655cf.  
50  
51  
52  
53
- 54 14. Hilliard ME, Harris MA, Weissberg-Benchell J. Diabetes resilience: a model of risk  
55  
56 and protection in type 1 diabetes. *Current Diabetes Reports* 2012; 12: 739-748.  
57  
58  
59  
60

- 1  
2  
3  
4  
5  
6  
7  
8  
9  
10  
11  
12  
13  
14  
15  
16  
17  
18  
19  
20  
21  
22  
23  
24  
25  
26  
27  
28  
29  
30  
31  
32  
33  
34  
35  
36  
37  
38  
39  
40  
41  
42  
43  
44  
45  
46  
47  
48  
49  
50  
51  
52  
53  
54  
55  
56  
57  
58  
59  
60
15. Taylor J, Jacoby A, Baker GA, Marson AG, Ring A, Whitehead M. Factors predictive of resilience and vulnerability in new-onset epilepsy. *Epilepsia* 2011; 52: 610-618.
16. Chen E, Strunk RC, Trethewey A, Schreier HM, Maharaj N, Miller GE. Resilience in low-socioeconomic-status children with asthma: adaptations to stress. *Journal of Allergy and Clinical Immunology* 2011; 128: 970-976.
17. Karoly P and Ruehlman LS. Psychological resilience and its correlates in chronic pain: Findings from a national community sample. *Pain* 2006; 123: 90-97.
18. Smith BW and Zautra AJ. Vulnerability and resilience in women with arthritis: test of a two factor model. *Journal of Consulting and Clinical Psychology* 2008; 76: 799-810.
19. Wright LJ, Zautra AJ, Going S. Adaptation to early knee osteoarthritis: the role of risk, resilience, and disease severity on pain and physical functioning. *Annals of Behavioral Medicine* 2008; 36: 70-80.
20. Sturgeon JA and Zautra AJ. Resilience: a new paradigm for adaptation to chronic pain. *Current Pain and Headache Reports* 2010; 14: 105-12.
21. West C, Stewart L, Foster K, Usher K. The meaning of resilience to persons living with chronic pain: an interpretive qualitative inquiry. *Journal of Clinical Nursing* 2012; 21: 1284-92.

- 1  
2  
3  
4  
5 22. Ramirez-Maestre C, Esteve R, Lopez AE. The path to capacity: resilience and spinal  
6 chronic pain. *Spine* 2012; 37: E251-8.  
7  
8  
9  
10  
11  
12 23. Smith BH, Hannaford PC, Elliott AM, Smith WC, Chambers WA. The "number needed  
13 to sample" in primary care research. Comparison of two primary care sampling  
14 frames for chronic back pain. *Family Practice* 2005; 22: 205-214.  
15  
16  
17  
18  
19  
20  
21 24. International Association for the Study of Pain. Classification of chronic pain. *Pain*  
22 1986; suppl 3: S1-S226  
23  
24  
25  
26  
27  
28  
29 25. Von Korff M, Ormel J, Keefe FJ, Dworkin SF. Grading the severity of chronic pain.  
30 *Pain* 1992; 50: 133-149.  
31  
32  
33  
34  
35  
36 26. Smith BH, Penny KI, Purves AM, Munro C, Wilson B, Grimshaw J, Chambers WA,  
37 Smith WC. The Chronic Pain Grade Questionnaire: validation and reliability in postal  
38 research. *Pain* 1997; 71: 141-147.  
39  
40  
41  
42  
43  
44  
45 27. Windle G, Bennett KM, Noyes J. A methodological review of resilience measurement  
46 scales. *Health and Quality of Life Outcomes* 2011, 9: 8.  
47  
48  
49  
50  
51  
52 28. Smith LK, Pope C, Botha J. Patient's help-seeking experiences and delay in cancer  
53 presentation: a qualitative synthesis. *Lancet* 2005, 366: 825-831.  
54  
55  
56  
57  
58  
59  
60

- 1  
2  
3 29. Elliott AM, Mcateer A, Hannaford PC. Incongruous consultation behaviour: Results  
4  
5 from a UK-wide population survey. *BMC Family Practice* 2012; 13: 21.  
6  
7  
8  
9  
10 30. Herrman H, Stewart DE, Diaz-Granados N, Berger EL, Jackson B, Yuen T. What is  
11  
12 resilience? *The Canadian Journal of Psychiatry* 2011; 56: 258-265.  
13  
14  
15  
16  
17 31. Earvolino-Ramirez M. Resilience: a concept analysis. *Nursing Forum* 2007; 42: 73-  
18  
19 82.  
20  
21  
22  
23  
24 32. Reich JW, Zautra AJ, Hall JS. *Handbook of adult resilience*. New York: The Guilford  
25  
26 Press, 2010.  
27  
28  
29  
30  
31  
32  
33  
34  
35  
36  
37  
38  
39  
40  
41  
42  
43  
44  
45  
46  
47  
48  
49  
50  
51  
52  
53  
54  
55  
56  
57  
58  
59  
60

1  
2  
3  
4  
5  
6  
7  
8  
9  
10  
11  
12  
13  
14  
15  
16  
17  
18  
19  
20  
21  
22  
23  
24  
25  
26  
27  
28  
29  
30  
31  
32  
33  
34  
35  
36  
37  
38  
39  
40  
41  
42  
43  
44  
45  
46  
47  
48  
49  
50  
51  
52  
53  
54  
55  
56  
57  
58  
59  
60

Figure 1: Flow chart depicting study process

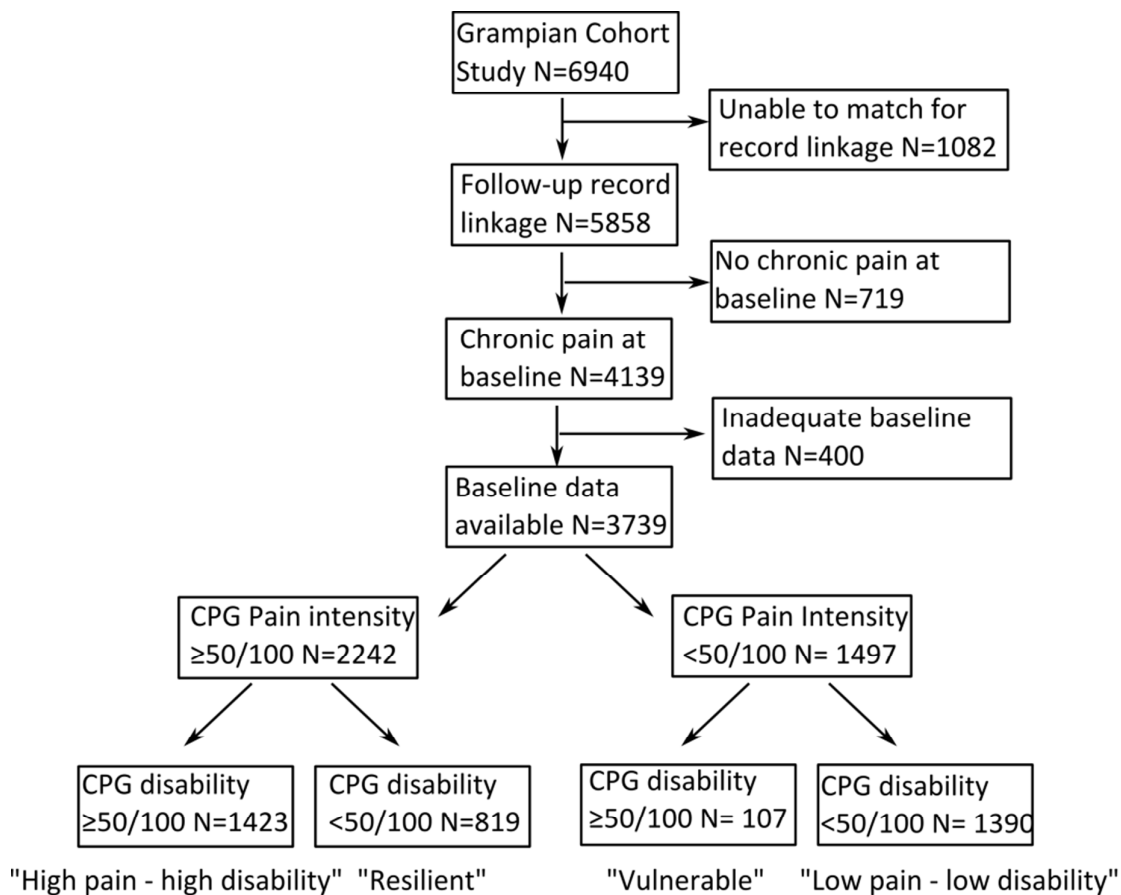

Only



Table 1: Factors associated with being in the resilient or vulnerable groups.

|                                   | Non-resilient |     | Resilient |                | Non-vulnerable |    | Vulnerable |                 |
|-----------------------------------|---------------|-----|-----------|----------------|----------------|----|------------|-----------------|
|                                   | N             | N   | OR        | (95%CI)        | N              | N  | OR         | (95%CI)         |
| <b>Sex</b>                        |               |     |           |                |                |    |            |                 |
| Male                              | 630           | 402 |           |                | 716            | 52 |            |                 |
| Female                            | 793           | 417 | 0.82      | (0.69 to 0.98) | 674            | 55 | 1.12       | (0.76 to 1.67)  |
| <b>Age group</b>                  |               |     |           |                |                |    |            |                 |
| 25-34                             | 80            | 68  |           |                | 113            | 10 |            |                 |
| 35-44                             | 198           | 113 | 0.67      | (0.45 to 1.00) | 187            | 15 | 0.91       | (0.39 to 2.09)  |
| 45-54                             | 301           | 173 | 0.68      | (0.47 to 0.98) | 255            | 14 | 0.62       | (0.27 to 1.44)  |
| 55-64                             | 323           | 172 | 0.63      | (0.43 to 0.91) | 299            | 24 | 0.91       | (0.42 to 1.96)  |
| 65-74                             | 266           | 172 | 0.76      | (0.52 to 1.11) | 325            | 23 | 0.80       | (0.37 to 1.73)  |
| 75+                               | 255           | 121 | 0.56      | (0.38 to 0.82) | 211            | 21 | 1.12       | (0.51 to 2.47)  |
| <b>Marital status</b>             |               |     |           |                |                |    |            |                 |
| Single                            | 126           | 80  |           |                | 113            | 12 |            |                 |
| Married / cohabit                 | 909           | 587 | 1.02      | (0.75 to 1.37) | 1005           | 65 | 0.61       | (0.32 to 1.16)  |
| No longer married                 | 367           | 147 | 0.63      | (0.45 to 0.89) | 253            | 28 | 1.04       | (0.51 to 2.12)  |
| <b>Education</b>                  |               |     |           |                |                |    |            |                 |
| University                        | 118           | 123 |           |                | 305            | 17 |            |                 |
| High school                       | 260           | 178 | 0.66      | (0.48 to 0.90) | 335            | 24 | 1.29       | (0.68 to 2.44)  |
| No qualifications                 | 878           | 470 | 0.51      | (0.39 to 0.68) | 656            | 60 | 1.64       | (0.94 to 2.86)  |
| <b>Housing</b>                    |               |     |           |                |                |    |            |                 |
| Owned/mortgaged                   | 663           | 547 |           |                | 977            | 59 |            |                 |
| Rented privately/other            | 62            | 30  | 0.59      | (0.37 to 0.92) | 64             | 6  | 1.55       | (0.65 to 3.73)  |
| Rented from council               | 675           | 236 | 0.42      | (0.35 to 0.51) | 323            | 40 | 2.05       | (1.35 to 3.12)  |
| <b>Social support</b>             |               |     |           |                |                |    |            |                 |
| Other adults in home              | 968           | 602 |           |                | 1030           | 68 |            |                 |
| No other adults                   | 368           | 173 | 0.76      | (0.61 to 0.93) | 271            | 35 | 1.96       | (1.27 to 3.00)  |
| <b>Employment</b>                 |               |     |           |                |                |    |            |                 |
| Working                           | 271           | 386 |           |                | 657            | 34 |            |                 |
| Retired                           | 474           | 270 | 0.40      | (0.32 to 0.50) | 527            | 42 | 1.54       | (0.97 to 2.46)  |
| Unable to work                    | 504           | 76  | 0.11      | (0.08 to 0.14) | 38             | 16 | 8.14       | (4.13 to 16.03) |
| Unemployed                        | 122           | 66  | 0.38      | (0.27 to 0.53) | 130            | 11 | 1.64       | (0.81 to 3.31)  |
| <b>Long-term limiting illness</b> |               |     |           |                |                |    |            |                 |
| No                                | 222           | 420 |           |                | 941            | 23 |            |                 |
| Yes                               | 1182          | 389 | 0.18      | (0.15 to 0.22) | 420            | 82 | 7.99       | (4.96 to 12.86) |

Figure 2: Kaplan Meier survival plots comparing: (a) resilient versus non-resilient; (b) vulnerable versus non-vulnerable groups.

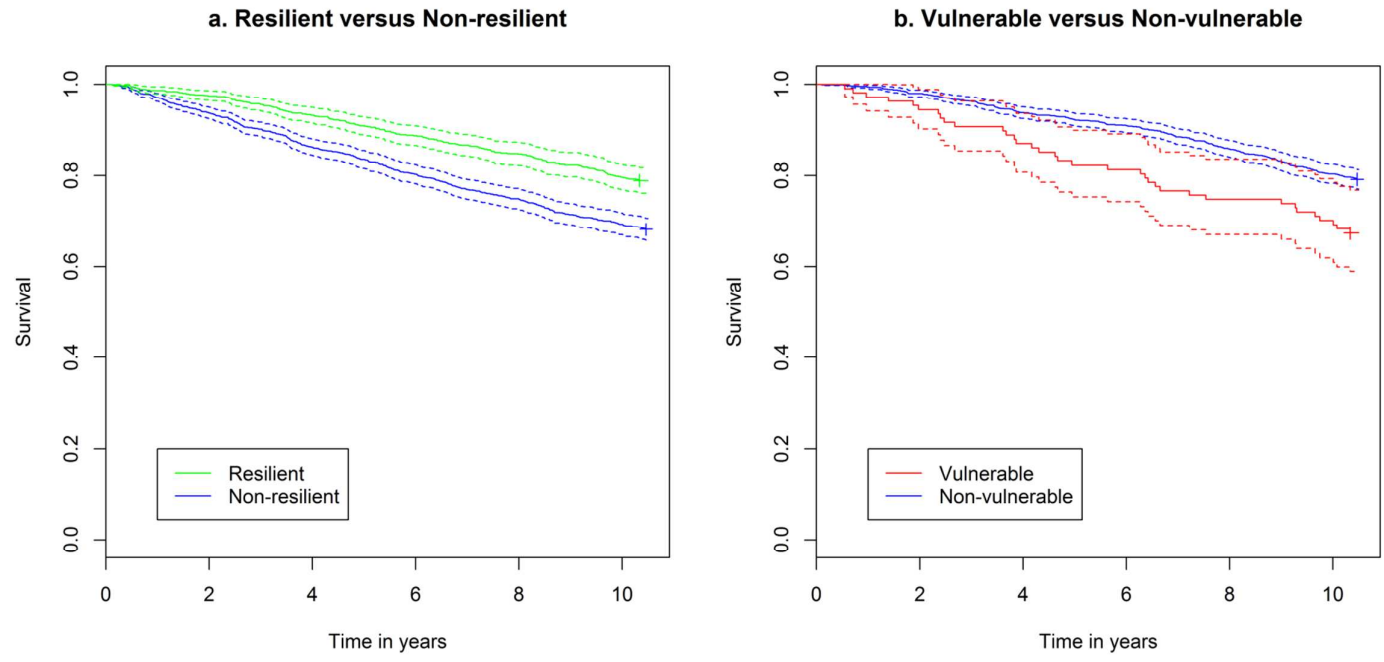

Dotted lines indicate 95% confidence intervals

only

**Table 2: Hazard ratios (HR) and 95% confidence intervals (CI) for ten-year mortality amongst vulnerable and resilient groups**

| Cause of death      | Deaths n (%) |               | Resilient group            |                                   |                                   | Deaths n (%) |                | Vulnerable group           |                                   |                                   |
|---------------------|--------------|---------------|----------------------------|-----------------------------------|-----------------------------------|--------------|----------------|----------------------------|-----------------------------------|-----------------------------------|
|                     | Resilient    | Non-resilient | Unadjusted HR (95% CI)     | Adjusted HR <sup>a</sup> (95% CI) | Adjusted HR <sup>b</sup> (95% CI) | Vulnerable   | Non-vulnerable | Unadjusted HR (95% CI)     | Adjusted HR <sup>a</sup> (95% CI) | Adjusted HR <sup>b</sup> (95% CI) |
| All cause mortality | 173 (21.1)   | 454 (31.9)    | <b>0.61 (0.51 to 0.73)</b> | <b>0.67 (0.55 to 0.81)</b>        | <b>0.75 (0.62 to 0.91)</b>        | 35 (32.7)    | 290 (20.9)     | <b>1.73 (1.22 to 2.46)</b> | <b>1.73 (1.20 to 2.49)</b>        | <b>1.45 (1.01 to 2.11)</b>        |
| Circulatory system  | 68 (9.5)     | 184 (16.0)    | <b>0.57 (0.43 to 0.76)</b> | <b>0.67 (0.49 to 0.90)</b>        | 0.79 (0.58 to 1.07)               | 16 (18.2)    | 117 (9.6)      | <b>2.05 (1.22 to 3.45)</b> | <b>2.07 (1.19 to 3.59)</b>        | <b>1.91 (1.08 to 3.38)</b>        |
| Neoplasm            | 52 (7.4)     | 112 (10.4)    | <b>0.71 (0.51 to 0.98)</b> | <b>0.65 (0.46 to 0.92)</b>        | <b>0.64 (0.44 to 0.93)</b>        | 7 (8.9)      | 98 (8.2)       | 1.10 (0.51 to 2.36)        | 1.16 (0.53 to 2.54)               | 0.93 (0.42 to 2.08)               |
| All other causes    | 53 (6.5)     | 158 (11.1)    | <b>0.53 (0.39 to 0.73)</b> | <b>0.63 (0.45 to 0.87)</b>        | 0.77 (0.55 to 1.09)               | 12 (11.2)    | 75 (5.4)       | <b>2.31 (1.25 to 4.24)</b> | <b>2.21 (1.16 to 4.18)</b>        | 1.64 (0.85 to 3.17)               |

Those classified as resilient compared against non-resilient and those classified as vulnerable compared against those non-vulnerable

<sup>a</sup> Adjusted for sex, age group, housing, and employment

<sup>b</sup> Adjusted for sex, age group, housing, employment and long-term limiting illness

Table 3: Specialist (hospital) care use over 10-year follow-up: comparison of resilient and non-resilient groups

|                  | Any outpatient/day case visit |           |             |                       |              | Number of outpatient/day case visits (excluding pts with no visits) |           |          |                |      |
|------------------|-------------------------------|-----------|-------------|-----------------------|--------------|---------------------------------------------------------------------|-----------|----------|----------------|------|
|                  | Non-resilient                 | Resilient | Adjusted    | (95%CI)               | p            | Non-resilient                                                       | Resilient | Adjusted | (95%CI)        | p    |
|                  | N                             | N         | OR†         |                       |              | median                                                              | median    | IRR†     |                |      |
| Medicine         | 840                           | 478       | 1.11        | (0.90 to 1.37)        | 0.34         | 3                                                                   | 3         | 1.07     | (0.86 to 1.34) | 0.53 |
| Surgical         | 1010                          | 593       | 0.97        | (0.77 to 1.23)        | 0.82         | 4                                                                   | 4         | 0.96     | (0.82 to 1.12) | 0.61 |
| Musculoskeletal  | 204                           | 89        | 0.95        | (0.69 to 1.30)        | 0.74         | 4                                                                   | 4         | 1.11     | (0.71 to 1.75) | 0.65 |
| Oncology         | 147                           | 83        | 1.01        | (0.72 to 1.42)        | 0.93         | 5                                                                   | 5         | 1.05     | (0.65 to 1.72) | 0.83 |
| Anaesthetics     | 107                           | 26        | <b>0.46</b> | <b>(0.27 to 0.79)</b> | <b>0.002</b> | 3                                                                   | 2         | 1.07     | (0.44 to 2.56) | 0.89 |
| Psychiatry       | 155                           | 73        | 1.03        | (0.72 to 1.47)        | 0.89         | 3                                                                   | 2         | 0.85     | (0.42 to 1.72) | 0.65 |
| All              | 1211                          | 720       | 1.21        | (0.90 to 1.64)        | 0.21         | 9                                                                   | 8         | 0.94     | (0.83 to 1.07) | 0.38 |
|                  | Any inpatient days            |           |             |                       |              | Total inpatient days (excluding pts with no visits)                 |           |          |                |      |
|                  | Non-resilient                 | Resilient | Adjusted    | (95%CI)               | p            | Non-resilient                                                       | Resilient | Adjusted | (95%CI)        | p    |
|                  | N                             | N         | OR†         |                       |              | median                                                              | median    | IRR†     |                |      |
| Medicine         | 755                           | 373       | 1.02        | (0.82 to 1.28)        | 0.84         | 19                                                                  | 15        | 1.01     | (0.81 to 1.26) | 0.90 |
| Surgical         | 646                           | 331       | 0.84        | (0.68 to 1.03)        | 0.10         | 7                                                                   | 6         | 0.85     | (0.64 to 1.11) | 0.23 |
| Musculoskeletal‡ | 53                            | 16        | 0.72        | (0.39 to 1.31)        | 0.28         | 12                                                                  | 10        | 0.76     | (0.38 to 1.51) | 0.43 |
| Oncology         | 70                            | 49        | 1.06        | (0.67 to 1.67)        | 0.80         | 11                                                                  | 15        | 1.58     | (0.44 to 5.64) | 0.48 |
| Anaesthetics‡    | 54                            | 17        | 0.76        | (0.42 to 1.36)        | 0.35         | 2                                                                   | 4         | 1.21     | (0.25 to 5.88) | 0.81 |
| Psychiatry‡      | 53                            | 19        | 0.72        | (0.41 to 1.27)        | 0.26         | 47                                                                  | 58        | 1.54     | (0.52 to 4.59) | 0.43 |
| All              | 1017                          | 514       | 0.80        | (0.64 to 1.01)        | 0.06         | 21                                                                  | 17        | 1.06     | (0.86 to 1.30) | 0.60 |

†Analysis adjusted for sex, age, housing, employment, and long term limiting illness; except where rows marked otherwise.

‡ Analysis adjusted for long term limiting illness only.

Table 4: Specialist (hospital) care use over 10-year follow-up: comparison of vulnerable and non-vulnerable groups

|                         | Any outpatient/day case visit |                 |                                      |              |  | Number of outpatient/day case visits (excluding pts with no visits) |                      |                                      |             |  |
|-------------------------|-------------------------------|-----------------|--------------------------------------|--------------|--|---------------------------------------------------------------------|----------------------|--------------------------------------|-------------|--|
|                         | Non-vulnerable<br>N           | Vulnerable<br>N | Adjusted OR†<br>(95%CI)              | p            |  | Non-vulnerable<br>median                                            | Vulnerable<br>median | Adjusted IRR†<br>(95%CI)             | p           |  |
| <b>Medicine</b>         | 695                           | 55              | 0.79<br>(0.51 to 1.22)               | 0.29         |  | 3                                                                   | 3                    | 0.97<br>(0.58 to 1.64)               | 0.92        |  |
| <b>Surgical</b>         | 1046                          | 73              | 0.68<br>(0.43 to 1.09)               | 0.11         |  | 4                                                                   | 5                    | 1.11<br>(0.79 to 1.56)               | 0.54        |  |
| <b>Musculoskeletal‡</b> | 116                           | 7               | 0.56<br>(0.25 to 1.26)               | 0.16         |  | 4                                                                   | 13                   | 1.48<br>(0.48 to 4.53)               | 0.50        |  |
| <b>Oncology‡</b>        | 139                           | 7               | 0.62<br>(0.28 to 1.38)               | 0.24         |  | 5                                                                   | 10                   | 1.27<br>(0.46 to 3.53)               | 0.65        |  |
| <b>Anaesthetics‡</b>    | 16                            | 4               | 2.45<br>(0.75 to 7.96)               | 0.14         |  | 2                                                                   | 1.5                  | 6.39<br>(0.73 to 55.97)              | 0.09        |  |
| <b>Psychiatry‡</b>      | 107                           | 16              | <b>1.96</b><br><b>(1.06 to 3.61)</b> | <b>0.03</b>  |  | 2                                                                   | 1.5                  | 1.45<br>(0.46 to 4.58)               | 0.52        |  |
| <b>All</b>              | 1238                          | 86              | <b>0.43</b><br><b>(0.25 to 0.75)</b> | <b>0.003</b> |  | 6                                                                   | 8                    | 1.18<br>(0.88 to 1.58)               | 0.27        |  |
|                         | Any inpatient days            |                 |                                      |              |  | Total inpatient days (excluding pts with no visits)                 |                      |                                      |             |  |
|                         | Non-vulnerable<br>N           | Vulnerable<br>N | Adjusted OR†<br>(95%CI)              | p            |  | Non-vulnerable<br>median                                            | Vulnerable<br>median | Adjusted IRR†<br>(95%CI)             | p           |  |
| <b>Medicine</b>         | 579                           | 56              | 1.1<br>(0.68 to 1.77)                | 0.70         |  | 12                                                                  | 21                   | 1.32<br>(0.84 to 2.07)               | 0.24        |  |
| <b>Surgical</b>         | 569                           | 54              | 1.37<br>(0.89 to 2.12)               | 0.16         |  | 6                                                                   | 7                    | 1.07<br>(0.68 to 1.69)               | 0.76        |  |
| <b>Musculoskeletal‡</b> | 14                            | 2               | 1.05<br>(0.23 to 4.86)               | 0.95         |  | 7.5                                                                 | 9                    | 0.68<br>(0.24 to 1.94)               | 0.47        |  |
| <b>Oncology‡</b>        | 65                            | 5               | 0.92<br>(0.35 to 2.40)               | 0.86         |  | 13                                                                  | 18                   | 0.71<br>(0.24 to 2.04)               | 0.52        |  |
| <b>Anaesthetics‡</b>    | 28                            | 2               | 0.82<br>(0.18 to 3.65)               | 0.80         |  | 3                                                                   | 2                    | <b>0.06</b><br><b>(0.00 to 0.93)</b> | <b>0.04</b> |  |
| <b>Psychiatry‡</b>      | 27                            | 4               | 1.54<br>(0.50 to 4.70)               | 0.45         |  | 123                                                                 | 11.5                 | 0.29<br>(0.09 to 0.98)               | 0.05        |  |
| <b>All</b>              | 865                           | 82              | 1.56<br>(0.92 to 2.67)               | 0.10         |  | 13                                                                  | 19                   | 1.13<br>(0.76 to 1.68)               | 0.56        |  |

†Adjusted for sex, age, housing, employment, and long term limiting illness; except where rows marked otherwise.

‡ Adjusted for long term limiting illness only.

## Appendix 1: Grouping of hospital activity categories

| Pooled categories analysed     | Original specialty group (ISD coding)      |
|--------------------------------|--------------------------------------------|
| <b>Medicine</b>                | General medicine (A1)                      |
|                                | Geriatric medicine (AB)                    |
|                                | Cardiology (A2)                            |
|                                | Endocrinology and diabetes (A8)            |
|                                | Endocrinology (A81)                        |
|                                | Diabetes (A82)                             |
|                                | Gastroenterology (A9)                      |
|                                | Renal medicine (AG)                        |
|                                | Respiratory medicine (AQ)                  |
|                                | Clinical genetics (A3)                     |
|                                | Infectious diseases (A6)                   |
|                                | Dermatology (A7)                           |
|                                | Homeopathy (AC)                            |
|                                | Neurology (AH)                             |
| Rehabilitation medicine (AP)   |                                            |
| GP other than obstetrics (E12) |                                            |
| <b>Surgical</b>                | General surgery (C1)                       |
|                                | General surgery excluding vasc & max (C11) |
|                                | Vascular surgery (C12)                     |
|                                | ENT (C5)                                   |
|                                | Gynaecology (F2)                           |
|                                | Cardiac surgery (C41)                      |
|                                | Thoracic surgery (C42)                     |
|                                | Neurosurgery (C6)                          |
|                                | Plastic surgery (C9)                       |
|                                | Ophthalmology (C7)                         |
|                                | Urology (CB)                               |
|                                | Oral surgery (D3)                          |
|                                | Oral medicine (D4)                         |
|                                | Orthodontics (D5)                          |
| Restorative dentistry (D6)     |                                            |
| <b>Musculoskeletal</b>         | Rheumatology (AR)                          |
|                                | Orthopaedic surgery (C8)                   |
| <b>Oncology</b>                | Medical oncology (AD)                      |
|                                | Clinical oncology (H2)                     |
|                                | Haematology (J4)                           |
| <b>Anaesthetics</b>            | Palliative medicine (AM)                   |
| <b>Psychiatry</b>              | Anaesthetics (C3)                          |
|                                | General psychiatry (G1)                    |
|                                | Forensic psychiatry (G3)                   |
|                                | Psychiatry of old age (G4)                 |
| Learning disability (G5)       |                                            |

### Competing interest declaration

All authors have completed the ICMJE uniform disclosure form at [www.icmje.org/coi\\_disclosure.pdf](http://www.icmje.org/coi_disclosure.pdf) and declare: no support from any organisation for the submitted work; no financial relationships with any organisations that might have an interest in the submitted work in the previous three years; no other relationships or activities that could appear to have influenced the submitted work.

### Author Contribution

AME and PCH planned and designed the paper. AME and CDB conducted the analysis. AME produced the first draft of the paper. CDB and PCH read and commented on the paper. All authors had full access to all of the data (including statistical reports and tables) in the study and can take responsibility for the integrity of the data and the accuracy of the data analysis. All authors have seen and approved the final version of the paper. AME is the guarantor of the paper. She accepts full responsibility for the conduct of the study.

### Funding

This work was supported by a project grant from the Chief Scientist Office, Scottish Executive, grant number CZG/2/287. The research team worked independently. The funders had no role in: the study design; data collection; analysis; interpretation of data; writing of the report; or the decision to submit the article for publication.

### Ethical approval

The study was approved by the Privacy Advisory Committee of NHS National Services, Scotland. Grampian Research Ethics Committee approved the original questionnaire survey and

1 subsequently confirmed that ethical approval was not required for the new linkage since no  
2  
3 information was being collected from participants and the linked dataset was anonymised.  
4  
5  
6  
7

### 8 **Data sharing**

9  
10 Patient level data from the linked dataset could be made available from the corresponding  
11  
12 author when relevant. Informed consent was not obtained because the presented data are  
13  
14 completely anonymous.  
15  
16  
17

### 18 **Copyright**

19  
20 The Corresponding Author has the right to grant on behalf of all authors and does grant on behalf  
21  
22 of all authors, a worldwide licence to the Publishers and its licensees in perpetuity, in all forms,  
23  
24 formats and media (whether known now or created in the future), to i) publish, reproduce,  
25  
26 distribute, display and store the Contribution, ii) translate the Contribution into other languages,  
27  
28 create adaptations, reprints, include within collections and create summaries, extracts and/or,  
29  
30 abstracts of the Contribution, iii) create any other derivative work(s) based on the Contribution,  
31  
32 iv) to exploit all subsidiary rights in the Contribution, v) the inclusion of electronic links from the  
33  
34 Contribution to third party material where-ever it may be located; and, vi) licence any third party  
35  
36 to do any or all of the above.  
37  
38  
39  
40  
41  
42  
43  
44  
45  
46

### 47 **Corresponding author statement**

48  
49 The Corresponding Author has the right to grant on behalf of all authors and does grant on behalf  
50  
51 of all authors, an exclusive licence (or non exclusive for government employees) on a worldwide  
52  
53 basis to the BMJ Publishing Group Ltd to permit this article (if accepted) to be published in BMJ  
54  
55 editions and any other BMJ PGL products and sublicences such use and exploit all subsidiary  
56  
57 rights, as set out in our licence.  
58  
59  
60





**Resilience does matter: evidence from a ten-year cohort  
record linkage study**

|                                    |                                                                                                                                                                                                                                   |
|------------------------------------|-----------------------------------------------------------------------------------------------------------------------------------------------------------------------------------------------------------------------------------|
| Journal:                           | <i>BMJ Open</i>                                                                                                                                                                                                                   |
| Manuscript ID:                     | bmjopen-2013-003917.R1                                                                                                                                                                                                            |
| Article Type:                      | Research                                                                                                                                                                                                                          |
| Date Submitted by the Author:      | 28-Nov-2013                                                                                                                                                                                                                       |
| Complete List of Authors:          | Elliott, Alison; University of Aberdeen, Academic Primary Care<br>Burton, Christopher; University of Aberdeen, Academic Primary Care<br>Hannaford, Phil; University of Aberdeen, Academic Primary Care;<br>University of Aberdeen |
| <b>Primary Subject<br>Heading</b>: | Health services research                                                                                                                                                                                                          |
| Secondary Subject Heading:         | General practice / Family practice, Epidemiology                                                                                                                                                                                  |
| Keywords:                          | EPIDEMIOLOGY, PAIN MANAGEMENT, PRIMARY CARE                                                                                                                                                                                       |
|                                    |                                                                                                                                                                                                                                   |

SCHOLARONE™  
Manuscripts

1  
2  
3 **Resilience does matter: evidence from a ten-year cohort record linkage study**  
4

5 Alison M Elliott, Christopher D Burton, Philip C Hannaford  
6  
7

8  
9  
10 Alison M Elliott

11  
12 Senior Research Fellow

13  
14 Centre of Academic Primary Care, Division of Applied Health Sciences, University of  
15 Aberdeen, Polwarth Building, Foresterhill, Aberdeen, AB25 2ZD.  
16  
17

18  
19  
20  
21 Christopher D Burton

22  
23 Clinical Senior Lecturer

24  
25 Centre of Academic Primary Care, Division of Applied Health Sciences, University of  
26 Aberdeen, Polwarth Building, Foresterhill, Aberdeen, AB25 2ZD.  
27  
28

29  
30  
31  
32 Philip C Hannaford

33  
34 Vice Principal (Research and Knowledge Exchange)

35  
36 Centre of Academic Primary Care, Division of Applied Health Sciences, University of  
37 Aberdeen, Polwarth Building, Foresterhill, Aberdeen, AB25 2ZD.  
38  
39  
40  
41

42  
43  
44  
45 Correspondence to:

46  
47 Alison M Elliott

48  
49 Centre of Academic Primary Care, Division of Applied Health Sciences, University of  
50 Aberdeen, Polwarth Building, Foresterhill, Aberdeen, AB25 2ZD.  
51  
52

53  
54 a.m.elliott@abdn.ac.uk  
55  
56  
57  
58  
59  
60

**ABSTRACT**

**Objectives** To examine ten-year mortality and hospital use among individuals categorised as resilient and vulnerable to the impact of chronic pain.

**Design** A cohort record linkage study.

**Setting** Grampian, Scotland

**Participants** 5858 individuals from the Grampian Pain Cohort, established in 1996, were linked, by probability matching, with national routinely collected datasets.

**Main outcome measures** Hazard ratios for subsequent ten-year mortality and odds ratios/incidence rate ratios for subsequent ten-year hospital use, each with adjustment for potential confounding variables.

**Results** 36.5% of those with high pain intensity reported low pain-related disability (categorised resilient) and 7.1% of those reporting low pain intensity reported high pain-related disability (categorised vulnerable). Sex, age, housing, employment and long-term limiting illness were independently associated with being vulnerable or resilient. After adjustment for these variables, individuals in the resilient group were 25% less likely to die within 10 years of the survey compared with non-resilient individuals: Hazard Ratio (HR) 0.75, 95% Confidence Interval (CI) 0.62 to 0.91 and vulnerable individuals were 45% more

1  
2  
3 likely to die than non-vulnerable individuals: HR 1.45, 95%CI 1.01 to 2.11. Resilient  
4  
5 individuals were less likely to have had an outpatient or day-case visit for anaesthetics: Odds  
6  
7 Ratio (OR) 0.46, 95% CI 0.27 to 0.79, but no other clinical specialities. Vulnerable individuals  
8  
9 were significantly less likely to have had any outpatient or day case visit (OR 0.43, 0.25 to  
10  
11 0.75); but more likely to have had a psychiatric visit (OR 1.96, 1.06 to 3.61). No significant  
12  
13 differences in likelihood of any inpatient visits were found.  
14  
15  
16  
17  
18  
19

20 **Conclusions** Resilient individuals have better ten-year survival than non-resilient individuals  
21  
22 indicating that resilience is a phenomenon worth researching. Further research is needed  
23  
24 to explore who is likely to become resilient, why and how, as well as to tease out the  
25  
26 internal and external factors that influence resilience.  
27  
28  
29  
30  
31  
32  
33  
34  
35  
36  
37  
38  
39  
40  
41  
42  
43  
44  
45  
46  
47  
48  
49  
50  
51  
52  
53  
54  
55  
56  
57  
58  
59  
60

## ARTICLE SUMMARY

### Article focus

- Little is known about the long term outcomes of resilient and vulnerable individuals.
- We examined long-term hospital use and mortality among those categorised as resilient and those categorised as vulnerable to the impact of chronic pain.
- Our hypotheses were that individual's categorized as resilient would fare better than a comparison group with a similar level of chronic pain, and individuals categorised as vulnerable would do worse.

### Key messages

- Resilient individuals were 25% less likely to die within 10 years than non-resilient individuals and vulnerable individuals were 45% more likely to die than non-vulnerable individuals.
- There were few differences in the use of hospital services over the ten years between the groups.
- Our findings suggest that the concept of resilience is a phenomenon worth researching. Important gains may be made in understanding who is likely to become resilient, why and how.

### Strengths and limitations of this study

- This is the first study to examine the long term effects of resilience or vulnerability to chronic pain in terms of survival and hospital use.

- A major strength of our study was its community base, meaning results from this study are more likely to be representative of people living in the community than those from studies using samples from healthcare settings, such as pain clinics.
- The prospective nature of the study meant that pain status was ascertained before outcome was measured, avoiding recall bias.
- We did not use a formal resilience measurement scale. Instead we categorised individuals on the basis of their scores on the intensity and disability sub-scales of a chronic pain measure.
- Although we were able to adjust for several socio-demographic variables in the analysis, some other potentially important factors were not fully available in the dataset (e.g. smoking).

1  
2  
3 •  
4  
5

## 6 INTRODUCTION

7 Chronic pain is common.<sup>1-3</sup> It has wide reaching physical, psychological, and social  
8 consequences<sup>3-7</sup> and places a heavy burden on individuals, society and healthcare services.  
9  
10  
11  
12  
13  
14  
15  
16  
17  
18  
19  
20  
21  
22  
23  
24  
25  
26  
27  
28  
29  
30  
31  
32  
33  
34  
35  
36  
37  
38  
39  
40  
41  
42  
43  
44  
45  
46  
47  
48  
49  
50  
51  
52  
53  
54  
55  
56  
57  
58  
59  
60

8,<sup>9</sup> While much clinical practice and research focuses on those who do badly with a condition ('vulnerable' individuals), interest is growing in understanding the characteristics and experiences of those who appear to do well ('resilient' individuals).<sup>10-11</sup> Recent studies have examined resilience to physical illness,<sup>12</sup> menopausal symptoms<sup>13</sup> and specific conditions such as diabetes,<sup>14</sup> epilepsy,<sup>15</sup> asthma<sup>16</sup> and chronic pain.<sup>17-22</sup> These studies have provided useful insights into the short-term importance of resilience. They have also indicated some of the factors accounting for why certain people appear to cope better with their condition than others, such as socio-economic factors, individual personality traits, psychological factors, spirituality, social support and general health. Little is known, however, about the long term outcomes of resilient and vulnerable individuals. Such information is needed to understand the clinical and research relevance of trying to identify both sets of individuals.

In this paper we linked information about respondents to a large community-based survey with routinely collected health service data to examine long-term (ten year) hospital use and mortality among those categorised as resilient and vulnerable to the impact of chronic pain. Our hypothesis was that those categorized as resilient would fare better than a comparison group with a similar level of chronic pain, and those categorised as vulnerable would do worse.

1  
2  
3  
4  
5  
6  
7  
8  
9  
10  
11  
12  
13  
14  
15  
16  
17  
18  
19  
20  
21  
22  
23  
24  
25  
26  
27  
28  
29  
30  
31  
32  
33  
34  
35  
36  
37  
38  
39  
40  
41  
42  
43  
44  
45  
46  
47  
48  
49  
50  
51  
52  
53  
54  
55  
56  
57  
58  
59  
60

For peer review only



## METHODS

### *Grampian cohort*

The Grampian cohort, established in July 1996,<sup>2</sup> comprised 6,940 adults (aged 25+ years) recruited from 29 practices across Grampian, North East Scotland. These included 3,605 individuals recruited through random selection from everyone registered with the practice (essentially a general population sample) and 3,335 individuals recruited through random selection based on those receiving repeat prescriptions for analgesic use. Full details of the survey have been reported previously.<sup>23</sup> Briefly, participants were sent a postal questionnaire in 1996 which included questions about the presence and severity of chronic pain and a range of items regarding health and socio-demographic details. The corrected response rate was 84.3% after two reminders. Study respondents were broadly representative of the Grampian population.<sup>7</sup>

### *Chronic pain status*

Individuals with chronic pain were identified by affirmative answers to two questions based on the International Study for the Association of Pain (IASP) definition<sup>24</sup>: (i) Are you currently troubled by pain or discomfort, either all the time or on and off? (ii) Have you had this pain or discomfort for more than three months?

### *Pain severity*

Chronic pain severity was assessed using the Chronic Pain Grade (CPG) questionnaire.<sup>25</sup> This is a seven-item instrument that measures severity in two dimensions: intensity sub-scale (three visual analogue scale items: current, worst and average pain intensity in the last six

1  
2  
3 months) and disability sub-scale (three visual analogue scale items: interference with daily  
4  
5 activities, social activities and daily work in the last six months; and one item on number of  
6  
7 days off work). A score is generated from the three visual analogue scale items for each  
8  
9 sub-scale, from 0 (best possible pain state) to 100 (worst possible pain state). These scores  
10  
11 and the item on number of days off work are then used to classify chronic pain into four  
12  
13 hierarchical grades, from Grade I (low disability-low intensity pain) to Grade IV (high  
14  
15 disability-severely limiting pain). The CPG has been shown to be valid and reliable for use in  
16  
17 a self-completion postal questionnaire in the UK general population.<sup>26</sup> Only those who gave  
18  
19 affirmative answers to both of the chronic pain questions were asked to complete the CPG  
20  
21 questionnaire.  
22  
23  
24  
25  
26  
27  
28

#### 29 *General health & socio-economic details*

30  
31 The questionnaire included several questions about general health. For this paper we used  
32  
33 results from a question on the presence or absence of a long-term limiting illness drawn  
34  
35 from the National Census (<http://www.gro-scotland.gov.uk/files/hseform.pdf>). The  
36  
37 questionnaire also included items regarding sex, age, marital status, education, housing,  
38  
39 social support and employment status.  
40  
41  
42  
43  
44

#### 45 ***National routinely collected datasets***

46  
47 In Scotland, routinely collected health information and statistics are collated and stored in a  
48  
49 national database by the Information Services Division (ISD), NHS Scotland  
50  
51 (<http://www.isdscotland.org/isd/1.html>). These routinely collected national datasets can be  
52  
53 linked with existing cohorts where adequate personal details are available. An advantage of  
54  
55 using national datasets is the ability to follow up members of a cohort who remain in  
56  
57  
58  
59  
60

1  
2  
3 Scotland but who move away from their recruitment location. Data (from 1996 to 2006  
4  
5 inclusive) about respondents to the Grampian survey was requested from four of the  
6  
7 national datasets: the General Register Office death records; SMR00- first attendances at  
8  
9 outpatient clinics; SMR01- inpatient and day case episodes in general and acute wards of  
10  
11 hospitals; and SMR04- inpatient and day cases in psychiatric units and hospitals.  
12  
13

### 14 15 16 17 **Record linkage**

18  
19 A copy of the Grampian cohort dataset was forwarded to the Medical Records Linkage Team  
20  
21 at ISD who undertook the linkage. ISD-held data were linked using standard probability  
22  
23 matching procedures based on common patient identifiable fields. The new linked dataset  
24  
25 was stripped of patient identifiers by ISD and returned to the research team in an  
26  
27 anonymised format. This approach enabled detailed analysis of the linked data, whilst  
28  
29 maintaining patient confidentiality. The study was approved by the Privacy Advisory  
30  
31 Committee of NHS National Services, Scotland. Grampian Research Ethics Committee  
32  
33 approved the original questionnaire survey and subsequently confirmed that ethical  
34  
35 approval was not required for the new linkage since no information was being collected  
36  
37 from participants and the linked dataset was anonymised.  
38  
39  
40  
41  
42  
43  
44

### 45 46 **Identification of resilient and vulnerable individuals**

47  
48 Individuals were categorised into one of four groups based on their scores on the intensity  
49  
50 and disability sub-scales of the CPG. Individuals with low pain-related disability (<50/100)  
51  
52 despite high pain intensity ( $\geq 50/100$ ) were categorised as 'resilient'; these individuals were  
53  
54 compared with 'non-resilient' individuals who reported both high pain-related disability  
55  
56 ( $\geq 50/100$ ) and high intensity pain ( $\geq 50/100$ ). Individuals with high pain-related disability  
57  
58  
59  
60

1  
2  
3 (≥50/100) in spite of low intensity pain (<50/100) were categorised as 'vulnerable'; these  
4  
5 individuals were compared with 'non-vulnerable' individuals who reported low intensity  
6  
7 pain (<50/100) and low pain-related disability (<50/100).  
8  
9

### 10 11 12 **Grouping of hospital-related data**

13  
14 Routine data were available for 42 different clinical specialties and included the number of  
15  
16 visits (as out-patient or day-case) and the total number of days spent as an in-patient, for  
17  
18 each specialty. In order to maximise our statistical power we pooled the different visit types  
19  
20 and collapsed the data into six categories: 1) medicine (general medicine, geriatric medicine,  
21  
22 all major medical specialties except rheumatology), 2) surgery (general surgery, all surgical  
23  
24 specialties e.g. ENT, gynaecology, but excluding orthopaedic surgery); 3) musculo-skeletal  
25  
26 (rheumatology and orthopaedic surgery); 4) anaesthetics (as pain clinics are coded by this  
27  
28 specialty); 5) oncology (including palliative care and haematology); and 6) psychiatry. Full  
29  
30 details of the categorisation are in appendix 1. Information about use of Accident &  
31  
32 Emergency services, which are largely accessed in an unscheduled way, was not available  
33  
34 since the datasets requested relate to scheduled care.  
35  
36  
37  
38  
39  
40  
41  
42

### 43 **Statistical analysis**

44  
45 Data were analysed using SPSS for Windows (version 19) and R 2.15.2. Descriptive statistics  
46  
47 examined the proportion of people categorised as resilient or vulnerable. Binary logistic  
48  
49 regression was then used to examine the demographic, socio-economic and health factors  
50  
51 associated with being in each group. In each case resilient individuals were compared with  
52  
53 those in the non-resilient comparison group and those in the vulnerable group were  
54  
55 compared with those in the non-vulnerable comparison group.  
56  
57  
58  
59  
60

1  
2  
3  
4  
5  
6  
7  
8  
9  
10  
11  
12  
13  
14  
15  
16  
17  
18  
19  
20  
21  
22  
23  
24  
25  
26  
27  
28  
29  
30  
31  
32  
33  
34  
35  
36  
37  
38  
39  
40  
41  
42  
43  
44  
45  
46  
47  
48  
49  
50  
51  
52  
53  
54  
55  
56  
57  
58  
59  
60

Cox regression survival analysis was conducted to obtain unadjusted and adjusted hazard ratios (HR) with 95% confidence intervals (CI) for all-cause mortality and cause of death. Adjustments were made for factors independently associated with being vulnerable or resilient on multivariate analysis. The assumption of constant time dependent covariates was checked for each model and found to hold.

Hospital use was analysed using a two stage procedure to test for differences in both binary (any visits or none) and continuous (number of visits in those having at least one visit) components. In view of over-dispersion in the data we used negative binomial regression for the continuous component with logistic regression for the binary. Results were expressed as odds ratios (OR) for the binary and incidence rate ratios (IRR) for the continuous component.

Sensitivity analyses were conducted to explore how our findings changed if: i) pain-related disability was measured in a different way; and ii) we adjusted for additional factors with incomplete data.

## RESULTS

ISD managed to link 5,858 (84.4%) of the 6,940 individuals in the original Grampian cohort. The characteristics of the linked cohort were very similar to the original complete cohort with no significant differences in demographic, socio-economic or pain factors. A total of 4139 (70.7%) of those in the linked cohort had chronic pain at baseline of which 3739

1  
2  
3 (90.3%) had detailed information on pain intensity and disability and were included in  
4  
5 subsequent analyses (see Figure 1).  
6  
7  
8  
9

### 10 ***Resilience and vulnerability***

11  
12 Of the 2242 individuals reporting high intensity pain, 819 (36.5%) reported low pain-related  
13 disability and were categorised as resilient, while 1423 (63.5%) reported high pain-related  
14 disability and were categorised as non-resilient. Among the 1497 individuals reporting low  
15 intensity pain, 107 (7.1%) had high pain-related disability and so were categorised as  
16 vulnerable, compared with 1390 (92.9%) who reported low pain-related disability and were  
17 categorised as non-vulnerable.  
18  
19  
20  
21  
22  
23  
24  
25  
26  
27  
28

### 29 ***Factors associated with being resilient and vulnerable***

30  
31 Table 1 presents the measured demographic, socio-economic and health factors associated  
32 with being in the resilient and vulnerable groups. On univariate analysis, individuals were  
33 *less* likely to be classified as resilient to their chronic pain if they were female, older, no  
34 longer married, had less than an university education, lived in rented accommodation, lived  
35 with no other adults, were not working and had a long-term limiting illness. Conversely,  
36 individuals were *more* likely to be classified as vulnerable to their chronic pain if they lived in  
37 rented council accommodation, lived with no other adults, were unable to work and had a  
38 long-term limiting illness. On multivariate analysis: sex, age, housing, employment and long-  
39 term limiting illness were identified as the factors independently associated with being  
40 vulnerable or resilient and were adjusted for in subsequent analyses.  
41  
42  
43  
44  
45  
46  
47  
48  
49  
50  
51  
52  
53  
54  
55  
56  
57

### 58 ***Mortality***

1  
2  
3 During the ten-year follow-up period, 21.1% of the resilient group and 31.9% of the non-  
4  
5 resilient group died (Table 2). In comparison, 32.7% of the vulnerable group and 20.9% of  
6  
7 the non-vulnerable group died. The main causes of death were broadly similar in each  
8  
9 group (Table 2).  
10

11  
12  
13  
14  
15 Kaplan Meier survival plots (Figure 2) show a progressive divergence over time between  
16  
17 resilient and non-resilient groups, and between vulnerable and non-vulnerable groups, with  
18  
19 no discontinuity. Table 2 details the results of the Cox proportional hazards regression  
20  
21 (expressed as hazard ratios). After adjusting for sex, age, housing, employment  
22  
23 (independently associated socio-demographic factors), and long term limiting illness  
24  
25 individuals in the resilient group were 25% less likely to die within 10 years of the survey  
26  
27 compared with non-resilient individuals: HR 0.75, 95% CI 0.62 to 0.91. A statistically  
28  
29 significant reduction in death from cancer among the resilient group also remained (HR  
30  
31 0.64, 0.44 to 0.93) after adjustment. After adjustment, vulnerable individuals were more  
32  
33 likely to die over the ten year period than non-vulnerable individuals: HR 1.45, 1.01 to 2.11  
34  
35 and vulnerable individuals were significantly more likely to die from circulatory diseases  
36  
37 than those in the non-vulnerable group (HR 1.91, 1.08 to 3.38).  
38  
39  
40  
41  
42  
43  
44

#### 45 ***Hospital use***

46  
47 Most individuals in each group used a hospital service at least once during the ten year  
48  
49 follow up period. Outpatient or day-case attendance occurred in 720 (87.9%) of resilient  
50  
51 individuals, 1211 (85.1%) of non-resilient individuals, 86 (80.4%) vulnerable individuals and  
52  
53 1238 (89.1%) of the non-vulnerable individuals. At least one inpatient admission occurred in  
54  
55  
56  
57  
58  
59  
60

1  
2  
3 514 (62.8%) resilient individuals, 1017 (71.5%) non-resilient individuals, 82 (76.6%)  
4  
5 vulnerable individuals and 865 (62.2%) non-vulnerable individuals.  
6  
7  
8  
9

10 Details of hospital use over the ten-year follow-up period are presented in table 3  
11 (comparing resilient and non-resilient groups) and table 4 (comparing vulnerable and non-  
12 vulnerable groups). Table 3 shows that compared with non-resilient individuals, resilient  
13 individuals with chronic pain were less likely to have had an outpatient or day-case visit for  
14 anaesthetics, the specialty which hosts pain clinics: adjusted OR 0.46, 0.27 to 0.79. There  
15 were no other statistically significant differences in visits for other clinical specialities. There  
16 were no statistically significant differences in the number of outpatient or day case visits.  
17 Nor were there any statistically significant differences in inpatient days between resilient  
18 and non-resilient groups. Compared with non-vulnerable individuals, those in the  
19 vulnerable group were significantly less likely to have any outpatient or day case visits  
20 (Table 4: adjusted OR 0.43, 0.25 to 0.75); and more likely to have an outpatient or day case  
21 psychiatric visit (OR 1.96, 1.06 to 3.61). There were no statistically significant differences in  
22 the number of outpatient or day case visits. No differences were observed between  
23 vulnerable and non-vulnerable groups for likelihood of any inpatient visits, or total number  
24 of inpatient days (except for anaesthetics). However, the very small number of inpatient  
25 admissions in the vulnerable group indicates that any inference from these should be  
26 viewed with caution.  
27  
28  
29  
30  
31  
32  
33  
34  
35  
36  
37  
38  
39  
40  
41  
42  
43  
44  
45  
46  
47  
48  
49  
50  
51

## 52 **DISCUSSION**

53  
54  
55 This is the first study to examine the long term effects of resilience or vulnerability to  
56 chronic pain in terms of survival and hospital use. We found that resilience to chronic pain  
57  
58  
59  
60



1  
2  
3 (as defined by low disability in spite of high intensity pain) was associated with a  
4  
5 significantly reduced risk of death over the subsequent ten years. With the exception of  
6  
7 pain services, resilient individuals made the same use of specialist services as the non-  
8  
9 resilient comparator group. We also found that individuals classified as vulnerable to their  
10  
11 chronic pain had poorer survival than those in the non-vulnerable comparison group. The  
12  
13 few differences between vulnerable and non-vulnerable individuals in their use of hospital  
14  
15 services related mainly to psychiatric and anaesthetic services.  
16  
17  
18  
19  
20

21  
22 A major strength of our study was its community base. Results from this study are more  
23  
24 likely to be representative of people living in the community than those from studies using  
25  
26 samples from healthcare settings, such as pain clinics. The prospective nature of the study  
27  
28 meant that pain status was ascertained before outcome was measured, avoiding recall bias.  
29  
30 Furthermore, long-term outcomes were available for analysis. We did not collect data using  
31  
32 a formal resilience scale<sup>27</sup>, unlike some previous studies of chronic pain<sup>17 18 28</sup>. The lack of  
33  
34 standardised definitions of vulnerability and resilience and the lack of use of a formal  
35  
36 resilience scale are limitations of our study. Instead, our analyses assume that self reported  
37  
38 pain intensity and disability due to pain correctly differentiated respondents into those  
39  
40 resilient or vulnerable to the effects of chronic pain. Individuals were categorised based on  
41  
42 their scores on the intensity and disability sub-scales of the CPG. Use of the two sub-scales  
43  
44 allowed us to use a measure of disability that was directly related to pain, rather than use of  
45  
46 a generic measure of health that could have been influenced by other conditions. This  
47  
48 approach meant that the two sub-scales were directly comparable. Since we did not use the  
49  
50 'days off work' question in the CPG questionnaire normally used to grade people, a  
51  
52 sensitivity analysis was undertaken to examine the effect of including this additional  
53  
54  
55  
56  
57  
58  
59  
60

1  
2  
3 question. Analysis showed that the findings did not materially change, with the same  
4  
5 overall pattern of results seen (data not shown). A strength of our approach is that it moves  
6  
7 away from groupings based on help seeking behaviour which is known to be a poor marker  
8  
9 of actual functioning.<sup>29 30</sup> Consulting a health care professional may not always identify  
10  
11 individuals who are “resilient” or “vulnerable” to their symptoms.  
12  
13

14  
15  
16  
17 Resilience and vulnerability were associated with several socio-demographic variables and  
18  
19 we were able to adjust for these in the analysis. Some other potentially important factors  
20  
21 were not fully available in the dataset, but were examined in an additional set of sensitivity  
22  
23 analyses to examine the effects of smoking and mental health in relation to survival. Data on  
24  
25 cigarette smoking was available from a follow up survey (conducted four years after  
26  
27 baseline) for 1572 of the 3739 individuals. There were no specific measures of mental  
28  
29 health in the original survey although it did include the SF-36 measure of health related  
30  
31 quality of life which includes a Mental Health component. Adding both of these variables in  
32  
33 turn into the survival models did not change the hazard ratios substantially, although  
34  
35 incomplete data led to wider confidence intervals. While we found few differences in  
36  
37 specialist care use between groups, our analyses did not allow for different survival between  
38  
39 groups, which meant that resilient individuals tended to have a longer period of time in  
40  
41 which to receive specialist treatment than non-resilient individuals; and vulnerable  
42  
43 individuals less time than non-vulnerable individuals. These patterns of survivorship are  
44  
45 likely to exaggerate differences between groups, rather than diminish them.  
46  
47  
48  
49  
50  
51

52  
53  
54  
55 There is growing interest in the phenomenon of resilience in a range of health and social  
56  
57 sciences. While hard to define,<sup>11 31 32</sup> it has been suggested that resilience describes  
58  
59  
60

1  
2  
3 something more than either hardiness (for instance not becoming unwell) or coping. Instead  
4  
5 it implies both experiencing adversity (illness) and adapting in order to bounce back and  
6  
7 thrive, sometimes in changed ways.<sup>33</sup> Our finding of generally comparable healthcare use  
8  
9 between resilient and non-resilient individuals suggests that resilience in our study was not  
10  
11 simply measuring hardiness.  
12  
13

14  
15  
16  
17 Whatever resilience is, and however it is measured, our finding of better survival among  
18  
19 resilient people with chronic pain, suggests that resilience is a phenomenon worth  
20  
21 researching. It was noteworthy that a larger proportion (36.5%) of individuals were resilient  
22  
23 than vulnerable (7.1%). This suggests that important gains may be made in understanding  
24  
25 who is likely to become resilient, why and how. We also need to understand more about  
26  
27 how resilience changes with time and what factors influences this. While there is already  
28  
29 some information available regarding the traits and activities that seem to influence  
30  
31 resilience (such as family, mood, social class, socio-economic status and life events),<sup>20 34 35</sup>  
32  
33 further research is needed to tease out both the internal and external factors that influence  
34  
35 an individual's resilience. Of particular importance will be the identification of modifiable  
36  
37 factors that could be used to help build additional resilience in individuals who could  
38  
39 benefit.  
40  
41  
42  
43  
44  
45  
46  
47  
48  
49  
50  
51  
52  
53  
54  
55  
56  
57  
58  
59  
60

### Competing interest declaration

All authors have completed the ICMJE uniform disclosure form at [www.icmje.org/coi\\_disclosure.pdf](http://www.icmje.org/coi_disclosure.pdf) and declare: no support from any organisation for the submitted work; no financial relationships with any organisations that might have an interest in the submitted work in the previous three years; no other relationships or activities that could appear to have influenced the submitted work.

### Author Contribution

AME and PCH planned and designed the paper. AME and CDB conducted the analysis. AME produced the first draft of the paper. CDB and PCH read and commented on the paper. All authors had full access to all of the data (including statistical reports and tables) in the study and can take responsibility for the integrity of the data and the accuracy of the data analysis. All authors have seen and approved the final version of the paper. AME is the guarantor of the paper. She accepts full responsibility for the conduct of the study.

### Funding

This work was supported by a project grant from the Chief Scientist Office, Scottish Executive, grant number CZG/2/287. The research team worked independently. The funders had no role in: the study design; data collection; analysis; interpretation of data; writing of the report; or the decision to submit the article for publication.

### **Ethical approval**

The study was approved by the Privacy Advisory Committee of NHS National Services, Scotland. Grampian Research Ethics Committee approved the original questionnaire survey and subsequently confirmed that ethical approval was not required for the new linkage since no information was being collected from participants and the linked dataset was anonymised.

### **Data sharing**

Patient level data from the linked dataset could be made available from the corresponding author when relevant. Informed consent was not obtained because the presented data are completely anonymous.

### **Copyright**

The Corresponding Author has the right to grant on behalf of all authors and does grant on behalf of all authors, a worldwide licence to the Publishers and its licensees in perpetuity, in all forms, formats and media (whether known now or created in the future), to i) publish, reproduce, distribute, display and store the Contribution, ii) translate the Contribution into other languages, create adaptations, reprints, include within collections and create summaries, extracts and/or, abstracts of the Contribution, iii) create any other derivative work(s) based on the Contribution, iv) to exploit all subsidiary rights in the Contribution, v) the inclusion of electronic links from the Contribution to third party material where-ever it may be located; and, vi) licence any third party to do any or all of the above.

### **Corresponding author statement**

1  
2  
3 The Corresponding Author has the right to grant on behalf of all authors and does grant on  
4  
5 behalf of all authors, an exclusive licence (or non exclusive for government employees) on a  
6  
7 worldwide basis to the BMJ Publishing Group Ltd to permit this article (if accepted) to be  
8  
9 published in BMJ editions and any other BMJ PGL products and sublicences such use and  
10  
11 exploit all subsidiary rights, as set out in our licence.  
12  
13  
14  
15  
16  
17  
18  
19  
20  
21  
22  
23  
24  
25  
26  
27  
28  
29  
30  
31  
32  
33  
34  
35  
36  
37  
38  
39  
40  
41  
42  
43  
44  
45  
46  
47  
48  
49  
50  
51  
52  
53  
54  
55  
56  
57  
58  
59  
60

For peer review only

## References

1. Verhaak PF, Kerssens JJ, Dekker J, et al. Prevalence of chronic benign pain disorder among adults: a review of the literature. *Pain* 1998; 77: 231–239.
2. Elliott AM, Smith BH, Penny KI, et al. The epidemiology of chronic pain in the community. *Lancet* 1999; 354: 1248-1252.
3. Breivik H, Collett B, Ventafridda V, et al. Survey of chronic pain in Europe: prevalence, impact on daily life, and treatment. *European Journal of Pain* 2006; 10: 287-333.
4. Magni G, Marchetti M, Moreschi C, et al. Chronic musculoskeletal pain and depressive symptoms in the National Health and Nutrition Examination I. Epidemiologic follow-up study. *Pain* 1993; 53: 163-168
5. Becker N, Thomsen AB, Olsen AK, et al. Pain epidemiology and health related quality of life in chronic non-malignant pain patients referred to a Danish multidisciplinary center. *Pain* 1997; 73: 393-400.
6. Gureje O, Von Korff M, Simon GE, et al. Persistent pain and well-being. A World Health Organization study in primary care. *Journal of the American Medical Association* 1998; 280: 147-151.

- 1  
2  
3 7. Smith BH, Elliott AM, Chambers WA, et al. The impact of chronic pain in the  
4  
5 community. *Family Practice* 2001; 18: 292-299.  
6  
7
- 8  
9  
10 8. Latham J and Davis BD. The socio-economic impact of chronic pain. *Disability and*  
11  
12 *Rehabilitation* 1994; 16: 39-44.  
13  
14
- 15  
16  
17 9. Maniadiakis N and Gray A. The economic burden of back pain in the UK. *Pain* 2000;  
18  
19 84: 95-103.  
20  
21
- 22  
23  
24 10. Carver CS. Resilience and thriving: issues, models and linkages. *Journal of Social*  
25  
26 *Issues* 1998; 54: 245-266.  
27  
28
- 29  
30  
31 11. Windle G. What is resilience? A review and concept analysis. *Reviews in Clinical*  
32  
33 *Gerontology* 2011; 21: 152-169.  
34  
35
- 36  
37  
38 12. Stewart DE, Yuen T. A systematic review of resilience in the physically ill.  
39  
40 *Psychosomatics* 2011 52: 199-209.  
41  
42
- 43  
44  
45 13. Duffy OK, Iversen L, Aucott L, et al. Factors associated with resilience or vulnerability  
46  
47 to hot flushes and night sweats during the menopausal transition'. *Menopause* 2012;  
48  
49 20(4) doi:10.1097/gme.0b013e31827655cf.  
50  
51
- 52  
53  
54  
55 14. Hilliard ME, Harris MA, Weissberg-Benchell J. Diabetes resilience: a model of risk  
56  
57 and protection in type 1 diabetes. *Current Diabetes Reports* 2012; 12: 739-748.  
58  
59  
60



- 1  
2  
3  
4  
5  
6  
7  
8  
9  
10  
11  
12  
13  
14  
15  
16  
17  
18  
19  
20  
21  
22  
23  
24  
25  
26  
27  
28  
29  
30  
31  
32  
33  
34  
35  
36  
37  
38  
39  
40  
41  
42  
43  
44  
45  
46  
47  
48  
49  
50  
51  
52  
53  
54  
55  
56  
57  
58  
59  
60
15. Taylor J, Jacoby A, Baker GA, et al. Factors predictive of resilience and vulnerability in new-onset epilepsy. *Epilepsia* 2011; 52: 610-618.
16. Chen E, Strunk RC, Trethewey A, et al. Resilience in low-socioeconomic-status children with asthma: adaptations to stress. *Journal of Allergy and Clinical Immunology* 2011; 128: 970-976.
17. Karoly P and Ruehlman LS. Psychological resilience and its correlates in chronic pain: Findings from a national community sample. *Pain* 2006; 123: 90-97.
18. Smith BW and Zautra AJ. Vulnerability and resilience in women with arthritis: test of a two factor model. *Journal of Consulting and Clinical Psychology* 2008; 76: 799-810.
19. Wright LJ, Zautra AJ, Going S. Adaptation to early knee osteoarthritis: the role of risk, resilience, and disease severity on pain and physical functioning. *Annals of Behavioral Medicine* 2008; 36: 70-80.
20. Sturgeon JA and Zautra AJ. Resilience: a new paradigm for adaptation to chronic pain. *Current Pain and Headache Reports* 2010; 14: 105-12.
21. West C, Stewart L, Foster K, et al. The meaning of resilience to persons living with chronic pain: an interpretive qualitative inquiry. *Journal of Clinical Nursing* 2012; 21: 1284-92.

- 1  
2  
3  
4  
5 22. Ramirez-Maestre C, Esteve R, Lopez AE. The path to capacity: resilience and spinal  
6 chronic pain. *Spine* 2012; 37: E251-8.  
7  
8  
9  
10  
11  
12 23. Smith BH, Hannaford PC, Elliott AM, et al. The "number needed to sample" in  
13 primary care research. Comparison of two primary care sampling frames for chronic  
14 back pain. *Family Practice* 2005; 22: 205-214.  
15  
16  
17  
18  
19  
20  
21 24. International Association for the Study of Pain. Classification of chronic pain. *Pain*  
22 1986; suppl 3: S1-S226  
23  
24  
25  
26  
27  
28  
29 25. Von Korff M, Ormel J, Keefe FJ, et al. Grading the severity of chronic pain. *Pain*  
30 1992; 50: 133-149.  
31  
32  
33  
34  
35  
36 26. Smith BH, Penny KI, Purves AM, et al. The Chronic Pain Grade Questionnaire:  
37 validation and reliability in postal research. *Pain* 1997; 71: 141-147.  
38  
39  
40  
41  
42  
43 27. Windle G, Bennett KM, Noyes J. A methodological review of resilience measurement  
44 scales. *Health and Quality of Life Outcomes* 2011; 9: 8.  
45  
46  
47  
48  
49 28. Peters ML, Vancleef LMG. The role of personality traits in pain perception and  
50 disability. *Reviews in Analgesia* 2008; 10: 11-22.  
51  
52  
53  
54  
55  
56  
57  
58  
59  
60

- 1  
2  
3 29. Smith LK, Pope C, Botha J. Patient's help-seeking experiences and delay in cancer  
4  
5 presentation: a qualitative synthesis. *Lancet* 2005; 366: 825-831.  
6  
7  
8  
9  
10 30. Elliott AM, Mcateer A, Hannaford PC. Incongruous consultation behaviour: Results  
11  
12 from a UK-wide population survey. *BMC Family Practice* 2012; 13: 21.  
13  
14  
15  
16  
17 31. Herrman H, Stewart DE, Diaz-Granados N, et al. What is resilience? The Canadian  
18  
19 Journal of Psychiatry 2011; 56: 258-265.  
20  
21  
22  
23  
24 32. Earvolino-Ramirez M. Resilience: a concept analysis. *Nursing Forum* 2007; 42: 73-  
25  
26 82.  
27  
28  
29  
30  
31 33. Reich JW, Zautra AJ, Hall JS. *Handbook of adult resilience*. New York: The Guilford  
32  
33 Press, 2010.  
34  
35  
36  
37 34. Rutter M. Resilience in the face of adversity. Protective factors and resistance to  
38  
39 psychiatric disorder. *British Journal of Psychiatry* 1985; 147: 598-611.  
40  
41  
42  
43 35. McCubbin HI and McCubbin MA. Typologies of resilient families: Emerging roles of  
44  
45 social class and ethnicity. *Family Relations* 1988; 37: 247-254.  
46  
47  
48  
49  
50  
51  
52  
53  
54  
55  
56  
57  
58  
59  
60

1  
2  
3  
4  
5  
6  
7  
8  
9  
10  
11  
12  
13  
14  
15  
16  
17  
18  
19  
20  
21  
22  
23  
24  
25  
26  
27  
28  
29  
30  
31  
32  
33  
34  
35  
36  
37  
38  
39  
40  
41  
42  
43  
44  
45  
46  
47  
48  
49  
50  
51  
52  
53  
54  
55  
56  
57  
58  
59  
60

Figure 1: Flow chart depicting study process

For peer review only

1  
2  
3  
4 **Figure 2: Kaplan Meier survival plots comparing: (a) resilient versus non-resilient; (b) vulnerable versus non-vulnerable groups.**  
5

6  
7 Dotted lines indicate 95% confidence intervals  
8  
9  
10  
11  
12  
13  
14  
15  
16  
17  
18  
19  
20  
21  
22  
23  
24  
25  
26  
27  
28  
29  
30  
31  
32  
33  
34  
35  
36  
37  
38  
39  
40  
41  
42  
43  
44  
45  
46  
47  
48  
49

For peer review only

Table 1: Factors associated with being in the resilient or vulnerable groups.

|                                   | Non-resilient |     | Resilient |                | Non-vulnerable |    | Vulnerable |                 |
|-----------------------------------|---------------|-----|-----------|----------------|----------------|----|------------|-----------------|
|                                   | N             | N   | OR        | (95%CI)        | N              | N  | OR         | (95%CI)         |
| <b>Sex</b>                        |               |     |           |                |                |    |            |                 |
| Male                              | 630           | 402 |           |                | 716            | 52 |            |                 |
| Female                            | 793           | 417 | 0.82      | (0.69 to 0.98) | 674            | 55 | 1.12       | (0.76 to 1.67)  |
| <b>Age group</b>                  |               |     |           |                |                |    |            |                 |
| 25-34                             | 80            | 68  |           |                | 113            | 10 |            |                 |
| 35-44                             | 198           | 113 | 0.67      | (0.45 to 1.00) | 187            | 15 | 0.91       | (0.39 to 2.09)  |
| 45-54                             | 301           | 173 | 0.68      | (0.47 to 0.98) | 255            | 14 | 0.62       | (0.27 to 1.44)  |
| 55-64                             | 323           | 172 | 0.63      | (0.43 to 0.91) | 299            | 24 | 0.91       | (0.42 to 1.96)  |
| 65-74                             | 266           | 172 | 0.76      | (0.52 to 1.11) | 325            | 23 | 0.80       | (0.37 to 1.73)  |
| 75+                               | 255           | 121 | 0.56      | (0.38 to 0.82) | 211            | 21 | 1.12       | (0.51 to 2.47)  |
| <b>Marital status</b>             |               |     |           |                |                |    |            |                 |
| Single                            | 126           | 80  |           |                | 113            | 12 |            |                 |
| Married / cohabit                 | 909           | 587 | 1.02      | (0.75 to 1.37) | 1005           | 65 | 0.61       | (0.32 to 1.16)  |
| No longer married                 | 367           | 147 | 0.63      | (0.45 to 0.89) | 253            | 28 | 1.04       | (0.51 to 2.12)  |
| <b>Education</b>                  |               |     |           |                |                |    |            |                 |
| University                        | 118           | 123 |           |                | 305            | 17 |            |                 |
| High school                       | 260           | 178 | 0.66      | (0.48 to 0.90) | 335            | 24 | 1.29       | (0.68 to 2.44)  |
| No qualifications                 | 878           | 470 | 0.51      | (0.39 to 0.68) | 656            | 60 | 1.64       | (0.94 to 2.86)  |
| <b>Housing</b>                    |               |     |           |                |                |    |            |                 |
| Owned/mortgaged                   | 663           | 547 |           |                | 977            | 59 |            |                 |
| Rented privately/other            | 62            | 30  | 0.59      | (0.37 to 0.92) | 64             | 6  | 1.55       | (0.65 to 3.73)  |
| Rented from council               | 675           | 236 | 0.42      | (0.35 to 0.51) | 323            | 40 | 2.05       | (1.35 to 3.12)  |
| <b>Social support</b>             |               |     |           |                |                |    |            |                 |
| Other adults in home              | 968           | 602 |           |                | 1030           | 68 |            |                 |
| No other adults                   | 368           | 173 | 0.76      | (0.61 to 0.93) | 271            | 35 | 1.96       | (1.27 to 3.00)  |
| <b>Employment</b>                 |               |     |           |                |                |    |            |                 |
| Working                           | 271           | 386 |           |                | 657            | 34 |            |                 |
| Retired                           | 474           | 270 | 0.40      | (0.32 to 0.50) | 527            | 42 | 1.54       | (0.97 to 2.46)  |
| Unable to work                    | 504           | 76  | 0.11      | (0.08 to 0.14) | 38             | 16 | 8.14       | (4.13 to 16.03) |
| Unemployed                        | 122           | 66  | 0.38      | (0.27 to 0.53) | 130            | 11 | 1.64       | (0.81 to 3.31)  |
| <b>Long-term limiting illness</b> |               |     |           |                |                |    |            |                 |
| No                                | 222           | 420 |           |                | 941            | 23 |            |                 |
| Yes                               | 1182          | 389 | 0.18      | (0.15 to 0.22) | 420            | 82 | 7.99       | (4.96 to 12.86) |

**Table 2: Hazard ratios (HR) and 95% confidence intervals (CI) for ten-year mortality amongst vulnerable and resilient groups**

| Cause of death      | Deaths n (%) |               | Resilient group            |                                   |                                   | Deaths n (%) |                | Vulnerable group           |                                   |                                   |
|---------------------|--------------|---------------|----------------------------|-----------------------------------|-----------------------------------|--------------|----------------|----------------------------|-----------------------------------|-----------------------------------|
|                     | Resilient    | Non-resilient | Unadjusted HR (95% CI)     | Adjusted HR <sup>a</sup> (95% CI) | Adjusted HR <sup>b</sup> (95% CI) | Vulnerable   | Non-vulnerable | Unadjusted HR (95% CI)     | Adjusted HR <sup>a</sup> (95% CI) | Adjusted HR <sup>b</sup> (95% CI) |
| All cause mortality | 173 (21.1)   | 454 (31.9)    | <b>0.61 (0.51 to 0.73)</b> | <b>0.67 (0.55 to 0.81)</b>        | <b>0.75 (0.62 to 0.91)</b>        | 35 (32.7)    | 290 (20.9)     | <b>1.73 (1.22 to 2.46)</b> | <b>1.73 (1.20 to 2.49)</b>        | <b>1.45 (1.01 to 2.11)</b>        |
| Circulatory system  | 68 (9.5)     | 184 (16.0)    | <b>0.57 (0.43 to 0.76)</b> | <b>0.67 (0.49 to 0.90)</b>        | 0.79 (0.58 to 1.07)               | 16 (18.2)    | 117 (9.6)      | <b>2.05 (1.22 to 3.45)</b> | <b>2.07 (1.19 to 3.59)</b>        | <b>1.91 (1.08 to 3.38)</b>        |
| Neoplasm            | 52 (7.4)     | 112 (10.4)    | <b>0.71 (0.51 to 0.98)</b> | <b>0.65 (0.46 to 0.92)</b>        | <b>0.64 (0.44 to 0.93)</b>        | 7 (8.9)      | 98 (8.2)       | 1.10 (0.51 to 2.36)        | 1.16 (0.53 to 2.54)               | 0.93 (0.42 to 2.08)               |
| All other causes    | 53 (6.5)     | 158 (11.1)    | <b>0.53 (0.39 to 0.73)</b> | <b>0.63 (0.45 to 0.87)</b>        | 0.77 (0.55 to 1.09)               | 12 (11.2)    | 75 (5.4)       | <b>2.31 (1.25 to 4.24)</b> | <b>2.21 (1.16 to 4.18)</b>        | 1.64 (0.85 to 3.17)               |

Those classified as resilient compared against non-resilient and those classified as vulnerable compared against those non-vulnerable

<sup>a</sup> Adjusted for sex, age group, housing, and employment

<sup>b</sup> Adjusted for sex, age group, housing, employment and long-term limiting illness

|                                    | Any outpatient/day case visit |           |                 |                       |              | Number of outpatient/day case visits (excluding pts with no visits) |           |                  |                |      |
|------------------------------------|-------------------------------|-----------|-----------------|-----------------------|--------------|---------------------------------------------------------------------|-----------|------------------|----------------|------|
|                                    | Non-resilient                 | Resilient | Adjusted        | (95%CI)               | p            | Non-resilient                                                       | Resilient | Adjusted         | (95%CI)        | p    |
|                                    | N                             | N         | OR <sup>†</sup> |                       |              | median                                                              | median    | IRR <sup>†</sup> |                |      |
| <b>Medicine</b>                    | 840                           | 478       | 1.11            | (0.90 to 1.37)        | 0.34         | 3                                                                   | 3         | 1.07             | (0.86 to 1.34) | 0.53 |
| <b>Surgical</b>                    | 1010                          | 593       | 0.97            | (0.77 to 1.23)        | 0.82         | 4                                                                   | 4         | 0.96             | (0.82 to 1.12) | 0.61 |
| <b>Musculoskeletal</b>             | 204                           | 89        | 0.95            | (0.69 to 1.30)        | 0.74         | 4                                                                   | 4         | 1.11             | (0.71 to 1.75) | 0.65 |
| <b>Oncology</b>                    | 147                           | 83        | 1.01            | (0.72 to 1.42)        | 0.93         | 5                                                                   | 5         | 1.05             | (0.65 to 1.72) | 0.83 |
| <b>Anaesthetics</b>                | 107                           | 26        | <b>0.46</b>     | <b>(0.27 to 0.79)</b> | <b>0.002</b> | 3                                                                   | 2         | 1.07             | (0.44 to 2.56) | 0.89 |
| <b>Psychiatry</b>                  | 155                           | 73        | 1.03            | (0.72 to 1.47)        | 0.89         | 3                                                                   | 2         | 0.85             | (0.42 to 1.72) | 0.65 |
| <b>All</b>                         | 1211                          | 720       | 1.21            | (0.90 to 1.64)        | 0.21         | 9                                                                   | 8         | 0.94             | (0.83 to 1.07) | 0.38 |
|                                    | Any inpatient days            |           |                 |                       |              | Total inpatient days (excluding pts with no visits)                 |           |                  |                |      |
|                                    | Non-resilient                 | Resilient | Adjusted        | (95%CI)               | p            | Non-resilient                                                       | Resilient | Adjusted         | (95%CI)        | p    |
|                                    | N                             | N         | OR <sup>†</sup> |                       |              | median                                                              | median    | IRR <sup>†</sup> |                |      |
| <b>Medicine</b>                    | 755                           | 373       | 1.02            | (0.82 to 1.28)        | 0.84         | 19                                                                  | 15        | 1.01             | (0.81 to 1.26) | 0.90 |
| <b>Surgical</b>                    | 646                           | 331       | 0.84            | (0.68 to 1.03)        | 0.10         | 7                                                                   | 6         | 0.85             | (0.64 to 1.11) | 0.23 |
| <b>Musculoskeletal<sup>‡</sup></b> | 53                            | 16        | 0.72            | (0.39 to 1.31)        | 0.28         | 12                                                                  | 10        | 0.76             | (0.38 to 1.51) | 0.43 |
| <b>Oncology</b>                    | 70                            | 49        | 1.06            | (0.67 to 1.67)        | 0.80         | 11                                                                  | 15        | 1.58             | (0.44 to 5.64) | 0.48 |
| <b>Anaesthetics<sup>‡</sup></b>    | 54                            | 17        | 0.76            | (0.42 to 1.36)        | 0.35         | 2                                                                   | 4         | 1.21             | (0.25 to 5.88) | 0.81 |
| <b>Psychiatry<sup>‡</sup></b>      | 53                            | 19        | 0.72            | (0.41 to 1.27)        | 0.26         | 47                                                                  | 58        | 1.54             | (0.52 to 4.59) | 0.43 |
| <b>All</b>                         | 1017                          | 514       | 0.80            | (0.64 to 1.01)        | 0.06         | 21                                                                  | 17        | 1.06             | (0.86 to 1.30) | 0.60 |

**Table 3: Specialist (hospital) care use over 10-year follow-up: comparison of resilient and non-resilient groups**

<sup>†</sup>Analysis adjusted for sex, age, housing, employment, and long term limiting illness; except where rows marked otherwise.

<sup>‡</sup>Analysis adjusted for long term limiting illness only.



1  
2  
3  
4  
5  
6  
7  
8  
9  
10  
11  
12  
13  
14  
15  
16  
17  
18  
19  
20  
21  
22  
23  
24  
25  
26  
27  
28  
29  
30  
31  
32  
33  
34  
35  
36  
37  
38  
39  
40  
41  
42  
43  
44  
45  
46  
47  
48  
49

---

| Any outpatient/day case visit |            |              | Number of outpatient/day case visits (excluding pts with no visits) |            |               |
|-------------------------------|------------|--------------|---------------------------------------------------------------------|------------|---------------|
| Non-vulnerable                | Vulnerable | Adjusted OR† | Non-vulnerable                                                      | Vulnerable | Adjusted IRR† |

For peer review only

Table 4: Specialist (hospital) care use over 10-year follow-up: comparison of vulnerable and non-vulnerable groups

|                  | N    | N  | (95%CI)                    | p            | median | median | (95%CI)              | p    |
|------------------|------|----|----------------------------|--------------|--------|--------|----------------------|------|
| Medicine         | 695  | 55 | 0.79 (0.51 to 1.22)        | 0.29         | 3      | 3      | 0.97 (0.58 to 1.64)  | 0.92 |
| Surgical         | 1046 | 73 | 0.68 (0.43 to 1.09)        | 0.11         | 4      | 5      | 1.11 (0.79 to 1.56)  | 0.54 |
| Musculoskeletal‡ | 116  | 7  | 0.56 (0.25 to 1.26)        | 0.16         | 4      | 13     | 1.48 (0.48 to 4.53)  | 0.50 |
| Oncology‡        | 139  | 7  | 0.62 (0.28 to 1.38)        | 0.24         | 5      | 10     | 1.27 (0.46 to 3.53)  | 0.65 |
| Anaesthetics‡    | 16   | 4  | 2.45 (0.75 to 7.96)        | 0.14         | 2      | 1.5    | 6.39 (0.73 to 55.97) | 0.09 |
| Psychiatry‡      | 107  | 16 | <b>1.96 (1.06 to 3.61)</b> | <b>0.03</b>  | 2      | 1.5    | 1.45 (0.46 to 4.58)  | 0.52 |
| All              | 1238 | 86 | <b>0.43 (0.25 to 0.75)</b> | <b>0.003</b> | 6      | 8      | 1.18 (0.88 to 1.58)  | 0.27 |

|                  | Any inpatient days  |                 |                            |      |                          | Total inpatient days (excluding pts with no visits) |                             |             |  |  |
|------------------|---------------------|-----------------|----------------------------|------|--------------------------|-----------------------------------------------------|-----------------------------|-------------|--|--|
|                  | Non-vulnerable<br>N | Vulnerable<br>N | Adjusted<br>OR†<br>(95%CI) | p    | Non-vulnerable<br>median | Vulnerable<br>median                                | Adjusted<br>IRR†<br>(95%CI) | p           |  |  |
| Medicine         | 579                 | 56              | 1.1 (0.68 to 1.77)         | 0.70 | 12                       | 21                                                  | 1.32 (0.84 to 2.07)         | 0.24        |  |  |
| Surgical         | 569                 | 54              | 1.37 (0.89 to 2.12)        | 0.16 | 6                        | 7                                                   | 1.07 (0.68 to 1.69)         | 0.76        |  |  |
| Musculoskeletal‡ | 14                  | 2               | 1.05 (0.23 to 4.86)        | 0.95 | 7.5                      | 9                                                   | 0.68 (0.24 to 1.94)         | 0.47        |  |  |
| Oncology‡        | 65                  | 5               | 0.92 (0.35 to 2.40)        | 0.86 | 13                       | 18                                                  | 0.71 (0.24 to 2.04)         | 0.52        |  |  |
| Anaesthetics‡    | 28                  | 2               | 0.82 (0.18 to 3.65)        | 0.80 | 3                        | 2                                                   | <b>0.06 (0.00 to 0.93)</b>  | <b>0.04</b> |  |  |
| Psychiatry‡      | 27                  | 4               | 1.54 (0.50 to 4.70)        | 0.45 | 123                      | 11.5                                                | 0.29 (0.09 to 0.98)         | 0.05        |  |  |
| All              | 865                 | 82              | 1.56 (0.92 to 2.67)        | 0.10 | 13                       | 19                                                  | 1.13 (0.76 to 1.68)         | 0.56        |  |  |

†Adjusted for sex, age, housing, employment, and long term limiting illness; except where rows marked otherwise.

‡ Adjusted for long term limiting illness only.

1  
2  
3  
4  
5  
6  
7  
8  
9  
10  
11  
12  
13  
14  
15  
16  
17  
18  
19  
20  
21  
22  
23  
24  
25  
26  
27  
28  
29  
30  
31  
32  
33  
34  
35  
36  
37  
38  
39  
40  
41  
42  
43  
44  
45  
46  
47  
48  
49  
50  
51  
52  
53  
54  
55  
56  
57  
58  
59  
60

For peer review only

1  
2  
3 **Resilience does matter: evidence from a ten-year cohort record linkage study**  
4

5 Alison M Elliott, Christopher D Burton, Philip C Hannaford  
6  
7

8  
9  
10 Alison M Elliott

11  
12 Senior Research Fellow

13  
14 Centre of Academic Primary Care, Division of Applied Health Sciences, University of  
15 Aberdeen, Polwarth Building, Foresterhill, Aberdeen, AB25 2ZD.  
16  
17

18  
19  
20  
21 Christopher D Burton

22  
23 Clinical Senior Lecturer

24  
25 Centre of Academic Primary Care, Division of Applied Health Sciences, University of  
26 Aberdeen, Polwarth Building, Foresterhill, Aberdeen, AB25 2ZD.  
27  
28

29  
30  
31  
32 Philip C Hannaford

33  
34 Vice Principal (Research and Knowledge Exchange)

35  
36 Centre of Academic Primary Care, Division of Applied Health Sciences, University of  
37 Aberdeen, Polwarth Building, Foresterhill, Aberdeen, AB25 2ZD.  
38  
39  
40  
41

42  
43  
44  
45 Correspondence to:

46  
47 Alison M Elliott

48  
49 Centre of Academic Primary Care, Division of Applied Health Sciences, University of  
50 Aberdeen, Polwarth Building, Foresterhill, Aberdeen, AB25 2ZD.  
51  
52

53  
54 a.m.elliott@abdn.ac.uk  
55  
56  
57  
58  
59  
60

## ABSTRACT

**Objectives** To examine ten-year mortality and hospital use among individuals categorised as resilient and vulnerable to the impact of chronic pain.

**Design** A cohort record linkage study.

**Setting** Grampian, Scotland

**Participants** 5858 individuals from the Grampian Pain Cohort, established in 1996, were linked, by probability matching, with national routinely collected datasets.

**Main outcome measures** Hazard ratios for subsequent ten-year mortality and odds ratios/incidence rate ratios for subsequent ten-year hospital use, each with adjustment for potential confounding variables.

**Results** 36.5% of those with high pain intensity reported low pain-related disability (categorised resilient) and 7.1% of those reporting low pain intensity reported high pain-related disability (categorised vulnerable). Sex, age, housing, employment and long-term limiting illness were independently associated with being vulnerable or resilient. After adjustment for these variables, individuals in the resilient group were 25% less likely to die within 10 years of the survey compared with non-resilient individuals: Hazard Ratio (HR) 0.75, 95% Confidence Interval (CI) 0.62 to 0.91 and vulnerable individuals were 45% more likely to die than non-vulnerable individuals: HR 1.45, 95%CI 1.01 to 2.11. Resilient

1  
2  
3 individuals were less likely to have had an outpatient or day-case visit for anaesthetics: Odds  
4  
5 Ratio (OR) 0.46, 95% CI 0.27 to 0.79, but no other clinical specialities. Vulnerable individuals  
6  
7 were significantly less likely to have had any outpatient or day case visit (OR 0.43, 0.25 to  
8  
9 0.75); but more likely to have had a psychiatric visit (OR 1.96, 1.06 to 3.61). No significant  
10  
11 differences in likelihood of any inpatient visits were found.  
12  
13

14  
15  
16  
17 **Conclusions** Resilient individuals have better ten-year survival than non-resilient individuals  
18  
19 indicating that resilience is a phenomenon worth researching. Further research is needed  
20  
21 to explore who is likely to become resilient, why and how, as well as to tease out the  
22  
23 internal and external factors that influence resilience.  
24  
25  
26  
27  
28  
29  
30  
31  
32  
33  
34  
35  
36  
37  
38  
39  
40  
41  
42  
43  
44  
45  
46  
47  
48  
49  
50  
51  
52  
53  
54  
55  
56  
57  
58  
59  
60

## ARTICLE SUMMARY

### Article focus

- Little is known about the long term outcomes of resilient and vulnerable individuals.
- We examined long-term hospital use and mortality among those categorised as resilient and those categorised as vulnerable to the impact of chronic pain.
- Our hypotheses were that individual's categorized as resilient would fare better than a comparison group with a similar level of chronic pain, and individuals categorised as vulnerable would do worse.

### Key messages

- Resilient individuals were 25% less likely to die within 10 years than non-resilient individuals and vulnerable individuals were 45% more likely to die than non-vulnerable individuals.
- There were few differences in the use of hospital services over the ten years between the groups.
- Our findings suggest that the concept of resilience is a phenomenon worth researching. Important gains may be made in understanding who is likely to become resilient, why and how.

### Strengths and limitations of this study

- This is the first study to examine the long term effects of resilience or vulnerability to chronic pain in terms of survival and hospital use.

- A major strength of our study was its community base, meaning results from this study are more likely to be representative of people living in the community than those from studies using samples from healthcare settings, such as pain clinics.
- The prospective nature of the study meant that pain status was ascertained before outcome was measured, avoiding recall bias.
- We did not use a formal resilience measurement scale. Instead we categorised individuals on the basis of their scores on the intensity and disability sub-scales of a chronic pain measure.
- Although we were able to adjust for several socio-demographic variables in the analysis, some other potentially important factors were not fully available in the dataset (e.g. smoking).



## INTRODUCTION

Chronic pain is common.<sup>1-3</sup> It has wide reaching physical, psychological, and social consequences<sup>3-7</sup> and places a heavy burden on individuals, society and healthcare services.<sup>8, 9</sup> While much clinical practice and research focuses on those who do badly with a condition ('vulnerable' individuals), interest is growing in understanding the characteristics and experiences of those who appear to do well ('resilient' individuals).<sup>10 11</sup> Recent studies have examined resilience to physical illness,<sup>12</sup> menopausal symptoms<sup>13</sup> and specific conditions such as diabetes,<sup>14</sup> epilepsy,<sup>15</sup> asthma<sup>16</sup> and chronic pain.<sup>17-22</sup> These studies have provided useful insights into the short-term importance of resilience. They have also indicated some of the factors accounting for why certain people appear to cope better with their condition than others, such as socio-economic factors, individual personality traits, psychological factors, spirituality, social support and general health. Little is known, however, about the long term outcomes of resilient and vulnerable individuals. Such information is needed to understand the clinical and research relevance of trying to identify both sets of individuals.

In this paper we linked information about respondents to a large community-based survey with routinely collected health service data to examine long-term (ten year) hospital use and mortality among those categorised as resilient and vulnerable to the impact of chronic pain. Our hypothesis was that those categorized as resilient would fare better than a comparison group with a similar level of chronic pain, and those categorised as vulnerable would do worse.

## METHODS

### *Grampian cohort*

The Grampian cohort, established in July 1996,<sup>2</sup> comprised 6,940 adults (aged 25+ years) recruited from 29 practices across Grampian, North East Scotland. These included 3,605 individuals recruited through random selection from everyone registered with the practice (essentially a general population sample) and 3,335 individuals recruited through random selection based on those receiving repeat prescriptions for analgesic use. Full details of the survey have been reported previously.<sup>23</sup> Briefly, participants were sent a postal questionnaire [in 1996](#) which included questions about the presence and severity of chronic pain and a range of items regarding health and socio-demographic details. The corrected response rate was 84.3% after two reminders. Study respondents were broadly representative of the Grampian population.<sup>7</sup>

### *Chronic pain status*

Individuals with chronic pain were identified by affirmative answers to two questions based on the International Study for the Association of Pain (IASP) definition<sup>24</sup>: (i) Are you currently troubled by pain or discomfort, either all the time or on and off? (ii) Have you had this pain or discomfort for more than three months?

### *Pain severity*

Chronic pain severity was assessed using the Chronic Pain Grade (CPG) questionnaire.<sup>25</sup> This is a seven-item instrument that measures severity in two dimensions: intensity sub-scale (three visual analogue scale items: current, worst and average pain intensity in the last six months) and disability sub-scale (three visual analogue scale items: interference with daily

1  
2  
3 activities, social activities and daily work in the last six months; and one item on number of  
4  
5 days off work). A score is generated from the three visual analogue scale items for each  
6  
7 sub-scale, from 0 (best possible pain state) to 100 (worst possible pain state). These scores  
8  
9 and the item on number of days off work are then used to classify chronic pain into four  
10  
11 hierarchical grades, from Grade I (low disability-low intensity pain) to Grade IV (high  
12  
13 disability-severely limiting pain). The CPG has been shown to be valid and reliable for use in  
14  
15 a self-completion postal questionnaire in the UK general population.<sup>26</sup> Only those who gave  
16  
17 affirmative answers to both of the chronic pain questions were asked to complete the CPG  
18  
19 questionnaire.  
20  
21  
22  
23

#### 24 25 26 27 *General health & socio-economic details*

28  
29 The questionnaire included several questions about general health. For this paper we used  
30  
31 results from a question on the presence or absence of a long-term limiting illness drawn  
32  
33 from the National Census (<http://www.gro-scotland.gov.uk/files/hseform.pdf>). The  
34  
35 questionnaire also included items regarding sex, age, marital status, education, housing,  
36  
37 social support and employment status.  
38  
39  
40  
41  
42

#### 43 44 *National routinely collected datasets*

45  
46 In Scotland, routinely collected health information and statistics are collated and stored in a  
47  
48 national database by the Information Services Division (ISD), NHS Scotland  
49  
50 (<http://www.isdscotland.org/isd/1.html>). These routinely collected national datasets can be  
51  
52 linked with existing cohorts where adequate personal details are available. An advantage of  
53  
54 using national datasets is the ability to follow up members of a cohort who remain in  
55  
56 Scotland but who move away from their recruitment location. Data (from 1996 to 2006  
57  
58  
59  
60

1  
2  
3 inclusive) about respondents to the Grampian survey was requested from four of the  
4  
5 national datasets: the General Register Office death records; SMR00- first attendances at  
6  
7 outpatient clinics; SMR01- inpatient and day case episodes in general and acute wards of  
8  
9 hospitals; and SMR04- inpatient and day cases in psychiatric units and hospitals.  
10  
11

### 12 13 14 ***Record linkage***

15  
16  
17 A copy of the Grampian cohort dataset was forwarded to the Medical Records Linkage Team  
18  
19 at ISD who undertook the linkage. ISD-held data were linked using standard probability  
20  
21 matching procedures based on common patient identifiable fields. The new linked dataset  
22  
23 was stripped of patient identifiers by ISD and returned to the research team in an  
24  
25 anonymised format. This approach enabled detailed analysis of the linked data, whilst  
26  
27 maintaining patient confidentiality. The study was approved by the Privacy Advisory  
28  
29 Committee of NHS National Services, Scotland. Grampian Research Ethics Committee  
30  
31 approved the original questionnaire survey and subsequently confirmed that ethical  
32  
33 approval was not required for the new linkage since no information was being collected  
34  
35 from participants and the linked dataset was anonymised.  
36  
37  
38  
39  
40  
41  
42

### 43 ***Identification of resilient and vulnerable individuals***

44  
45 Individuals were categorised into one of four groups based on their scores on the intensity  
46  
47 and disability sub-scales of the CPG. Individuals with low pain-related disability (<50/100)  
48  
49 despite high pain intensity ( $\geq 50/100$ ) were categorised as 'resilient'; these individuals were  
50  
51 compared with 'non-resilient' individuals who reported both high pain-related disability  
52  
53 ( $\geq 50/100$ ) and high intensity pain ( $\geq 50/100$ ). Individuals with high pain-related disability  
54  
55 ( $\geq 50/100$ ) in spite of low intensity pain (<50/100) were categorised as 'vulnerable'; these  
56  
57  
58  
59  
60

1  
2  
3 individuals were compared with 'non-vulnerable' individuals who reported low intensity  
4  
5 pain (<50/100) and low pain-related disability (<50/100).  
6  
7

### 8 9 10 ***Grouping of hospital-related data***

11  
12 Routine data were available for 42 different clinical specialties and included the number of  
13  
14 visits (as out-patient or day-case) and the total number of days spent as an in-patient, for  
15  
16 each specialty. In order to maximise our statistical power we pooled the different visit types  
17  
18 and collapsed the data into six categories: 1) medicine (general medicine, geriatric medicine,  
19  
20 all major medical specialties except rheumatology), 2) surgery (general surgery, all surgical  
21  
22 specialties e.g. ENT, gynaecology, but excluding orthopaedic surgery); 3) musculo-skeletal  
23  
24 (rheumatology and orthopaedic surgery); 4) anaesthetics (as pain clinics are coded by this  
25  
26 specialty); 5) oncology (including palliative care and haematology); and 6) psychiatry. Full  
27  
28 details of the categorisation are in appendix 1. Information about use of Accident &  
29  
30 Emergency services, which are largely accessed in an unscheduled way, was not available  
31  
32 since the datasets requested relate to scheduled care.  
33  
34  
35  
36  
37  
38  
39

### 40 41 ***Statistical analysis***

42  
43 Data were analysed using SPSS for Windows (version 19) and R 2.15.2. Descriptive statistics  
44  
45 examined the proportion of people categorised as resilient or vulnerable. Binary logistic  
46  
47 regression was then used to examine the demographic, socio-economic and health factors  
48  
49 associated with being in each group. In each case resilient individuals were compared with  
50  
51 those in the non-resilient comparison group and those in the vulnerable group were  
52  
53 compared with those in the non-vulnerable comparison group.  
54  
55  
56  
57  
58  
59  
60

1  
2  
3 Cox regression survival analysis was conducted to obtain unadjusted and adjusted hazard  
4 ratios (HR) with 95% confidence intervals (CI) for all-cause mortality and cause of death.  
5  
6 Adjustments were made for factors independently associated with being vulnerable or  
7  
8 resilient on multivariate analysis. The assumption of constant time dependent covariates  
9  
10 was checked for each model and found to hold.  
11  
12  
13

14  
15  
16  
17 Hospital use was analysed using a two stage procedure to test for differences in both binary  
18 (any visits or none) and continuous (number of visits in those having at least one visit)  
19 components. In view of over-dispersion in the data we used negative binomial regression  
20 for the continuous component with logistic regression for the binary. Results were  
21 expressed as odds ratios (OR) for the binary and incidence rate ratios (IRR) for the  
22 continuous component.  
23  
24  
25  
26  
27  
28  
29  
30  
31  
32

33  
34 Sensitivity analyses were conducted to explore how our findings changed if: i) pain-related  
35 disability was measured in a different way; and ii) we adjusted for additional factors with  
36 incomplete data.  
37  
38  
39  
40  
41  
42

## 43 RESULTS

44  
45 ISD managed to link 5,858 (84.4%) of the 6,940 individuals in the original Grampian cohort.  
46  
47 The characteristics of the linked cohort were very similar to the original complete cohort  
48 with no significant differences in demographic, socio-economic or pain factors. A total of  
49 4139 (70.7%) of those in the linked cohort had chronic pain at baseline of which 3739  
50 (90.3%) had detailed information on pain intensity and disability and were included in  
51 subsequent analyses (see Figure 1).  
52  
53  
54  
55  
56  
57  
58  
59  
60

### ***Resilience and vulnerability***

Of the 2242 individuals reporting high intensity pain, 819 (36.5%) reported low pain-related disability and were categorised as resilient, while 1423 (63.5%) reported high pain-related disability and were categorised as non-resilient. Among the 1497 individuals reporting low intensity pain, 107 (7.1%) had high pain-related disability and so were categorised as vulnerable, compared with 1390 (92.9%) who reported low pain-related disability and were categorised as non-vulnerable.

### ***Factors associated with being resilient and vulnerable***

Table 1 presents the measured demographic, socio-economic and health factors associated with being in the resilient and vulnerable groups. On univariate analysis, individuals were *less* likely to be classified as resilient to their chronic pain if they were female, older, no longer married, had less than a university education, lived in rented accommodation, lived with no other adults, were not working and had a long-term limiting illness. Conversely, individuals were *more* likely to be classified as vulnerable to their chronic pain if they lived in rented council accommodation, lived with no other adults, were unable to work and had a long-term limiting illness. On multivariate analysis: sex, age, housing, employment and long-term limiting illness were identified as the factors independently associated with being vulnerable or resilient and were adjusted for in subsequent analyses.

### ***Mortality***

During the ten-year follow-up period, 21.1% of the resilient group and 31.9% of the non-resilient group died (Table 2). In comparison, 32.7% of the vulnerable group and 20.9% of

1  
2  
3 the non-vulnerable group died. The main causes of death were broadly similar in each  
4  
5 group (Table 2).  
6  
7

8  
9  
10 Kaplan Meier survival plots (Figure 2) show a progressive divergence over time between  
11  
12 resilient and non-resilient groups, and between vulnerable and non-vulnerable groups, with  
13  
14 no discontinuity. Table 2 details the results of the Cox proportional hazards regression  
15  
16 (expressed as hazard ratios). After adjusting for sex, age, housing, employment  
17  
18 (independently associated socio-demographic factors), and long term limiting illness  
19  
20 individuals in the resilient group were 25% less likely to die within 10 years of the survey  
21  
22 compared with non-resilient individuals: HR 0.75, 95% CI 0.62 to 0.91. A statistically  
23  
24 significant reduction in death from cancer among the resilient group also remained (HR  
25  
26 0.64, 0.44 to 0.93) after adjustment. After adjustment, vulnerable individuals were more  
27  
28 likely to die over the ten year period than non-vulnerable individuals: HR 1.45, 1.01 to 2.11  
29  
30 and vulnerable individuals were significantly more likely to die from circulatory diseases  
31  
32 than those in the non-vulnerable group (HR 1.91, 1.08 to 3.38).  
33  
34  
35  
36  
37  
38  
39

#### 40 ***Hospital use***

41  
42 Most individuals in each group used a hospital service at least once during the ten year  
43  
44 follow up period. Outpatient or day-case attendance occurred in 720 (87.9%) of resilient  
45  
46 individuals, 1211 (85.1%) of non-resilient individuals, 86 (80.4%) vulnerable individuals and  
47  
48 1238 (89.1%) of the non-vulnerable individuals. At least one inpatient admission occurred in  
49  
50 514 (62.8%) resilient individuals, 1017 (71.5%) non-resilient individuals, 82 (76.6%)  
51  
52 vulnerable individuals and 865 (62.2%) non-vulnerable individuals.  
53  
54  
55  
56  
57  
58  
59  
60



1  
2  
3 Details of hospital use over the ten-year follow-up period are presented in table 3  
4  
5 (comparing resilient and non-resilient groups) and table 4 (comparing vulnerable and non-  
6  
7 vulnerable groups). Table 3 shows that compared with non-resilient individuals, resilient  
8  
9 individuals with chronic pain were less likely to have had an outpatient or day-case visit for  
10  
11 anaesthetics, the specialty which hosts pain clinics: adjusted OR 0.46, 0.27 to 0.79. There  
12  
13 were no other statistically significant differences in visits for other clinical specialities. There  
14  
15 were no statistically significant differences in the number of outpatient or day case visits.  
16  
17 Nor were there any statistically significant differences in inpatient days between resilient  
18  
19 and non-resilient groups. Compared with non-vulnerable individuals, those in the  
20  
21 vulnerable group were significantly less likely to have any outpatient or day case visits  
22  
23 (Table 4: adjusted OR 0.43, 0.25 to 0.75); and more likely to have an outpatient or day case  
24  
25 psychiatric visit (OR 1.96, 1.06 to 3.61). There were no statistically significant differences in  
26  
27 the number of outpatient or day case visits. No differences were observed between  
28  
29 vulnerable and non-vulnerable groups for likelihood of any inpatient visits, or total number  
30  
31 of inpatient days (except for anaesthetics). However, the very small number of inpatient  
32  
33 admissions in the vulnerable group indicates that any inference from these should be  
34  
35 viewed with caution.  
36  
37  
38  
39  
40  
41  
42  
43  
44

## 45 **DISCUSSION**

46  
47 This is the first study to examine the long term effects of resilience or vulnerability to  
48  
49 chronic pain in terms of survival and hospital use. We found that resilience to chronic pain  
50  
51 (as defined by low disability in spite of high intensity pain) was associated with a  
52  
53 significantly reduced risk of death over the subsequent ten years. With the exception of  
54  
55 pain services, resilient individuals made the same use of specialist services as the non-  
56  
57  
58  
59  
60

1  
2  
3 resilient comparator group. We also found that individuals classified as vulnerable to their  
4  
5 chronic pain had poorer survival than those in the non-vulnerable comparison group. The  
6  
7 few differences between vulnerable and non-vulnerable individuals in their use of hospital  
8  
9 services related mainly to psychiatric and anaesthetic services.  
10  
11

12  
13  
14 A major strength of our study was its community base. Results from this study are more  
15  
16 likely to be representative of people living in the community than those from studies using  
17  
18 samples from healthcare settings, such as pain clinics. The prospective nature of the study  
19  
20 meant that pain status was ascertained before outcome was measured, avoiding recall bias.  
21  
22 Furthermore, long-term outcomes were available for analysis. We did not use a formal  
23  
24 resilience measurement scale.<sup>27</sup> unlike some previous studies of chronic pain<sup>17 18 28</sup>. The  
25  
26 lack of standardised definitions of vulnerability and resilience and the lack of use of a formal  
27  
28 resilience scale are limitations of our study. ~~Our~~ analyses assume that self  
29  
30 reported pain intensity and disability due to pain correctly differentiated respondents into  
31  
32 those resilient or vulnerable to the effects of chronic pain. Individuals were categorised  
33  
34 based on their scores on the intensity and disability sub-scales of the CPG. Use of the two  
35  
36 sub-scales allowed us to use a measure of disability that was directly related to pain, rather  
37  
38 than use of a generic measure of health that could have been influenced by other  
39  
40 conditions. This approach meant that the two sub-scales were directly comparable. Since  
41  
42 we did not use the 'days off work' question in the CPG questionnaire normally used to grade  
43  
44 people, a sensitivity analysis was undertaken to examine the effect of including this  
45  
46 additional question. Analysis showed that the findings did not materially change, with the  
47  
48 same overall pattern of results seen (data not shown). A strength of our approach is that it  
49  
50 moves away from groupings based on help seeking behaviour which is known to be a poor  
51  
52  
53  
54  
55  
56  
57  
58  
59  
60

1  
2  
3 marker of actual functioning.<sup>298 2930</sup> Consulting a health care professional may not always  
4  
5 identify individuals who are “resilient” or “vulnerable” to their symptoms.  
6  
7

8  
9  
10 Resilience and vulnerability were associated with several socio-demographic variables and  
11  
12 we were able to adjust for these in the analysis. Some other potentially important factors  
13  
14 were not fully available in the dataset, but were examined in an additional set of sensitivity  
15  
16 analyses to examine the effects of smoking and mental health in relation to survival. Data on  
17  
18 cigarette smoking was available from a follow up survey (conducted four years after  
19  
20 baseline) for 1572 of the 3739 individuals. There were no specific measures of mental  
21  
22 health in the original survey although it did include the SF-36 measure of health related  
23  
24 quality of life which includes a Mental Health component. Adding both of these variables in  
25  
26 turn into the survival models did not change the hazard ratios substantially, although  
27  
28 incomplete data led to wider confidence intervals. While we found few differences in  
29  
30 specialist care use between groups, our analyses did not allow for different survival between  
31  
32 groups, which meant that resilient individuals tended to have a longer period of time in  
33  
34 which to receive specialist treatment than non-resilient individuals; and vulnerable  
35  
36 individuals less time than non-vulnerable individuals. These patterns of survivorship are  
37  
38 likely to exaggerate differences between groups, rather than diminish them.  
39  
40  
41  
42  
43  
44  
45  
46  
47

48 There is growing interest in the phenomenon of resilience in a range of health and social  
49  
50 sciences. While hard to define,<sup>11 301 342</sup> it has been suggested that resilience describes  
51  
52 something more than either hardiness (for instance not becoming unwell) or coping. Instead  
53  
54 it implies both experiencing adversity (illness) and adapting in order to bounce back and  
55  
56 thrive, sometimes in changed ways.<sup>323</sup> Our finding of generally comparable healthcare use  
57  
58  
59  
60

1  
2  
3 between resilient and non-resilient individuals suggests that resilience in our study was not  
4  
5 simply measuring hardiness.  
6  
7

8  
9  
10 Whatever resilience is, and however it is measured, our finding of better survival among  
11  
12 resilient people with chronic pain, suggests that resilience is a phenomenon worth  
13  
14 researching. It was noteworthy that a larger proportion (36.5%) of individuals were resilient  
15  
16 than vulnerable (7.1%). This suggests that important gains may be made in understanding  
17  
18

19 who is likely to become resilient, why and how. We also need to understand more about  
20  
21 how resilience changes with time and what factors influences this. While there is already  
22  
23 some information available regarding the traits and activities that seem to influence  
24  
25 resilience (such as family, mood, social class, socio-economic status and life events), <sup>20 34 35</sup>  
26  
27

28  
29 Further research is ~~now~~ needed to tease out both the internal (~~e.g. personality traits, self-~~  
30  
31 ~~efficacy~~) and external (~~e.g. social support~~) factors that influence an individual's resilience.  
32  
33

34 Of particular importance will be the identification of modifiable factors that could be used  
35  
36 to help build additional resilience in individuals who could benefit.  
37  
38  
39  
40  
41  
42  
43  
44  
45  
46  
47  
48  
49  
50  
51  
52  
53  
54  
55  
56  
57  
58  
59  
60

## References

1. Verhaak PF, Kerssens JJ, Dekker J, Sorbi MJ, Bensing JM. Prevalence of chronic benign pain disorder among adults: a review of the literature. *Pain* 1998; 77: 231–239.
2. Elliott AM, Smith BH, Penny KI, Smith WC, Chambers WA. The epidemiology of chronic pain in the community. *Lancet* 1999; 354: 1248-1252.
3. Breivik H, Collett B, Ventafridda V, Cohen R, Gallacher D. Survey of chronic pain in Europe: prevalence, impact on daily life, and treatment. *European Journal of Pain* 2006; 10: 287-333.
4. Magni G, Marchetti M, Moreschi C, Merskey H, Luchini SR. Chronic musculoskeletal pain and depressive symptoms in the National Health and Nutrition Examination I. Epidemiologic follow-up study. *Pain* 1993; 53: 163-168
5. Becker N, Thomsen AB, Olsen AK, Sjogren P, Bech P, Eriksen J. Pain epidemiology and health related quality of life in chronic non-malignant pain patients referred to a Danish multidisciplinary center. *Pain* 1997; 73: 393-400.
6. Gureje O, Von Korff M, Simon GE, Gater R. Persistent pain and well-being. A World Health Organization study in primary care. *Journal of the American Medical Association* 1998; 280: 147-151.

- 1  
2  
3 7. Smith BH, Elliott AM, Chambers WA, Smith WC, Hannaford PC, Penny K. The impact  
4  
5 of chronic pain in the community. *Family Practice* 2001; 18: 292-299.  
6  
7  
8  
9
- 10 8. Latham J and Davis BD. The socio-economic impact of chronic pain. *Disability and*  
11  
12 *Rehabilitation* 1994; 16: 39-44.  
13  
14  
15  
16
- 17 9. Maniadiakis N and Gray A. The economic burden of back pain in the UK. *Pain* 2000;  
18  
19 84: 95-103.  
20  
21  
22  
23
- 24 10. Carver CS. Resilience and thriving: issues, models and linkages. *Journal of Social*  
25  
26 *Issues* 1998; 54: 245-266.  
27  
28  
29  
30
- 31 11. Windle G. What is resilience? A review and concept analysis. *Reviews in Clinical*  
32  
33 *Gerontology* 2011; 21: 152-169.  
34  
35  
36  
37
- 38 12. Stewart DE, Yuen T. A systematic review of resilience in the physically ill.  
39  
40 *Psychosomatics* 2011 52: 199-209.  
41  
42  
43  
44
- 45 13. Duffy OK, Iversen L, Aucott L, Hannaford PC. Factors associated with resilience or  
46  
47 vulnerability to hot flushes and night sweats during the menopausal transition'.  
48  
49 *Menopause* 2012; 20(4) doi:10.1097/gme.0b013e31827655cf.  
50  
51  
52  
53
- 54 14. Hilliard ME, Harris MA, Weissberg-Benchell J. Diabetes resilience: a model of risk  
55  
56 and protection in type 1 diabetes. *Current Diabetes Reports* 2012; 12: 739-748.  
57  
58  
59  
60

- 1  
2  
3  
4  
5  
6  
7  
8  
9  
10  
11  
12  
13  
14  
15  
16  
17  
18  
19  
20  
21  
22  
23  
24  
25  
26  
27  
28  
29  
30  
31  
32  
33  
34  
35  
36  
37  
38  
39  
40  
41  
42  
43  
44  
45  
46  
47  
48  
49  
50  
51  
52  
53  
54  
55  
56  
57  
58  
59  
60
15. Taylor J, Jacoby A, Baker GA, Marson AG, Ring A, Whitehead M. Factors predictive of resilience and vulnerability in new-onset epilepsy. *Epilepsia* 2011; 52: 610-618.
16. Chen E, Strunk RC, Trethewey A, Schreier HM, Maharaj N, Miller GE. Resilience in low-socioeconomic-status children with asthma: adaptations to stress. *Journal of Allergy and Clinical Immunology* 2011; 128: 970-976.
17. Karoly P and Ruehlman LS. Psychological resilience and its correlates in chronic pain: Findings from a national community sample. *Pain* 2006; 123: 90-97.
18. Smith BW and Zautra AJ. Vulnerability and resilience in women with arthritis: test of a two factor model. *Journal of Consulting and Clinical Psychology* 2008; 76: 799-810.
19. Wright LJ, Zautra AJ, Going S. Adaptation to early knee osteoarthritis: the role of risk, resilience, and disease severity on pain and physical functioning. *Annals of Behavioral Medicine* 2008; 36: 70-80.
20. Sturgeon JA and Zautra AJ. Resilience: a new paradigm for adaptation to chronic pain. *Current Pain and Headache Reports* 2010; 14: 105-12.
21. West C, Stewart L, Foster K, Usher K. The meaning of resilience to persons living with chronic pain: an interpretive qualitative inquiry. *Journal of Clinical Nursing* 2012; 21: 1284-92.

- 1  
2  
3  
4  
5  
6  
7  
8  
9  
10  
11  
12  
13  
14  
15  
16  
17  
18  
19  
20  
21  
22  
23  
24  
25  
26  
27  
28  
29  
30  
31  
32  
33  
34  
35  
36  
37  
38  
39  
40  
41  
42  
43  
44  
45  
46  
47  
48  
49  
50  
51  
52  
53  
54  
55  
56  
57  
58  
59  
60
22. Ramirez-Maestre C, Esteve R, Lopez AE. The path to capacity: resilience and spinal chronic pain. *Spine* 2012; 37: E251-8.
23. Smith BH, Hannaford PC, Elliott AM, Smith WC, Chambers WA. The "number needed to sample" in primary care research. Comparison of two primary care sampling frames for chronic back pain. *Family Practice* 2005; 22: 205-214.
24. International Association for the Study of Pain. Classification of chronic pain. *Pain* 1986; suppl 3: S1-S226
25. Von Korff M, Ormel J, Keefe FJ, Dworkin SF. Grading the severity of chronic pain. *Pain* 1992; 50: 133-149.
26. Smith BH, Penny KI, Purves AM, Munro C, Wilson B, Grimshaw J, Chambers WA, Smith WC. The Chronic Pain Grade Questionnaire: validation and reliability in postal research. *Pain* 1997; 71: 141-147.
27. Windle G, Bennett KM, Noyes J. A methodological review of resilience measurement scales. *Health and Quality of Life Outcomes* 2011, 9: 8.
28. Peters ML, Vancleef LMG. The role of personality traits in pain perception and disability. *Reviews in Analgesia* 2008; 10: 11-22.



1  
2  
3 | ~~27-29.~~ Smith LK, Pope C, Botha J. Patient's help-seeking experiences and delay in  
4  
5  
6  
7  
8  
9  
10  
11  
12  
13  
14  
15  
16  
17  
18  
19  
20  
21  
22  
23  
24  
25  
26  
27  
28  
29  
30  
31  
32  
33  
34  
35  
36  
37  
38  
39  
40  
41  
42  
43  
44  
45  
46  
47  
48  
49  
50  
51  
52  
53  
54  
55  
56  
57  
58  
59  
60  
cancer presentation: a qualitative synthesis. *Lancet* 2005, 366: 825-831.

~~28-30.~~ Elliott AM, Mcateer A, Hannaford PC. Incongruous consultation behaviour:  
Results from a UK-wide population survey. *BMC Family Practice* 2012; 13: 21.

~~29-31.~~ Herrman H, Stewart DE, Diaz-Granados N, Berger EL, Jackson B, Yuen T. What  
is resilience? *The Canadian Journal of Psychiatry* 2011; 56: 258-265.

~~30-32.~~ Earvolino-Ramirez M. Resilience: a concept analysis. *Nursing Forum* 2007;  
42: 73-82.

33. Reich JW, Zautra AJ, Hall JS. *Handbook of adult resilience*. New York: The Guilford  
Press, 2010.

34. Rutter M. Resilience in the face of adversity. Protective factors and resistance to  
psychiatric disorder. *British Journal of Psychiatry* 1985; 147: 598-611.

35. McCubbin HI and McCubbin MA. Typologies of resilient families: Emerging roles of  
social class and ethnicity. *Family Relations* 1988; 37: 247-254.

Figure 1: Flow chart depicting study process

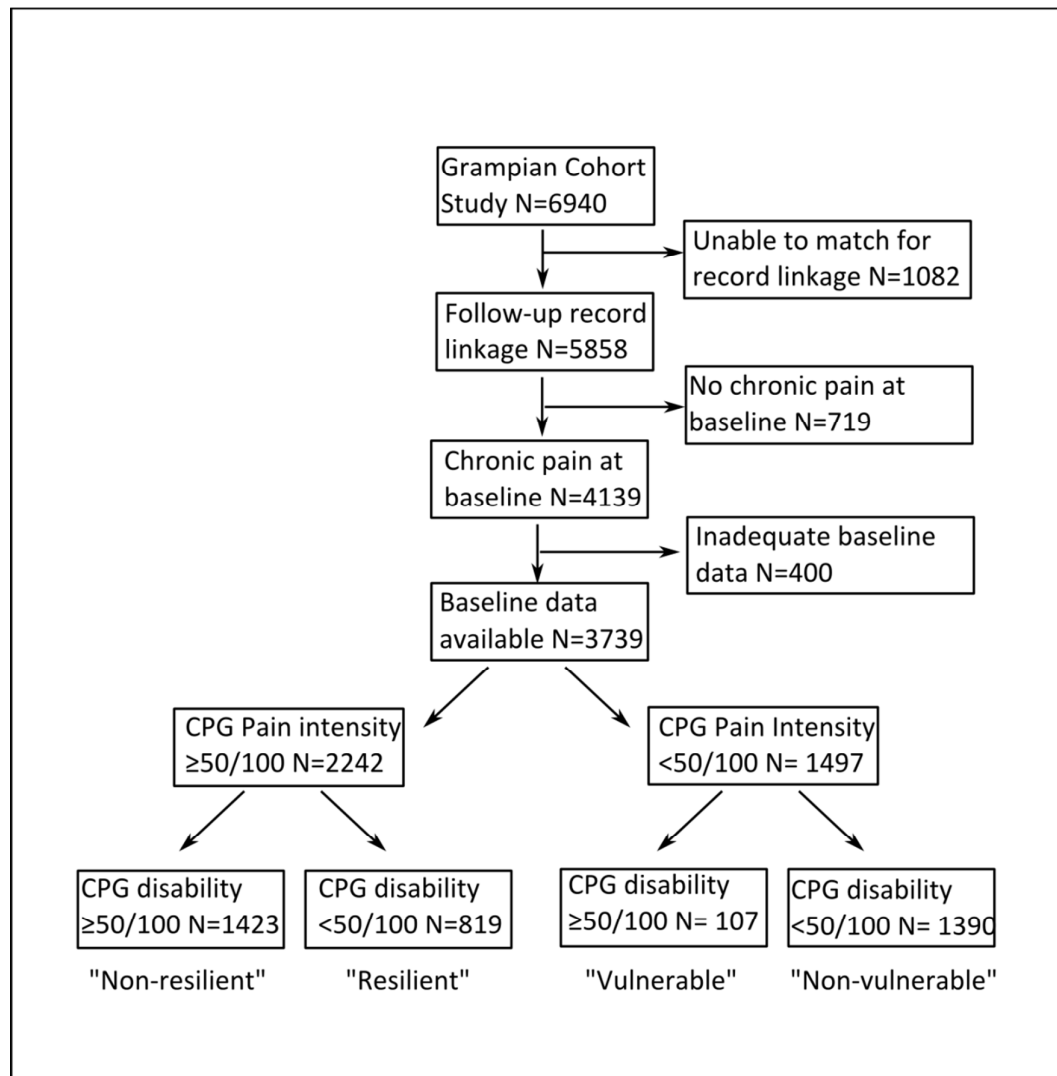

Table 1: Factors associated with being in the resilient or vulnerable groups.

|                                   | Non-resilient |     | Resilient |                | Non-vulnerable |    | Vulnerable |                 |
|-----------------------------------|---------------|-----|-----------|----------------|----------------|----|------------|-----------------|
|                                   | N             | N   | OR        | (95%CI)        | N              | N  | OR         | (95%CI)         |
| <b>Sex</b>                        |               |     |           |                |                |    |            |                 |
| Male                              | 630           | 402 |           |                | 716            | 52 |            |                 |
| Female                            | 793           | 417 | 0.82      | (0.69 to 0.98) | 674            | 55 | 1.12       | (0.76 to 1.67)  |
| <b>Age group</b>                  |               |     |           |                |                |    |            |                 |
| 25-34                             | 80            | 68  |           |                | 113            | 10 |            |                 |
| 35-44                             | 198           | 113 | 0.67      | (0.45 to 1.00) | 187            | 15 | 0.91       | (0.39 to 2.09)  |
| 45-54                             | 301           | 173 | 0.68      | (0.47 to 0.98) | 255            | 14 | 0.62       | (0.27 to 1.44)  |
| 55-64                             | 323           | 172 | 0.63      | (0.43 to 0.91) | 299            | 24 | 0.91       | (0.42 to 1.96)  |
| 65-74                             | 266           | 172 | 0.76      | (0.52 to 1.11) | 325            | 23 | 0.80       | (0.37 to 1.73)  |
| 75+                               | 255           | 121 | 0.56      | (0.38 to 0.82) | 211            | 21 | 1.12       | (0.51 to 2.47)  |
| <b>Marital status</b>             |               |     |           |                |                |    |            |                 |
| Single                            | 126           | 80  |           |                | 113            | 12 |            |                 |
| Married / cohabit                 | 909           | 587 | 1.02      | (0.75 to 1.37) | 1005           | 65 | 0.61       | (0.32 to 1.16)  |
| No longer married                 | 367           | 147 | 0.63      | (0.45 to 0.89) | 253            | 28 | 1.04       | (0.51 to 2.12)  |
| <b>Education</b>                  |               |     |           |                |                |    |            |                 |
| University                        | 118           | 123 |           |                | 305            | 17 |            |                 |
| High school                       | 260           | 178 | 0.66      | (0.48 to 0.90) | 335            | 24 | 1.29       | (0.68 to 2.44)  |
| No qualifications                 | 878           | 470 | 0.51      | (0.39 to 0.68) | 656            | 60 | 1.64       | (0.94 to 2.86)  |
| <b>Housing</b>                    |               |     |           |                |                |    |            |                 |
| Owned/mortgaged                   | 663           | 547 |           |                | 977            | 59 |            |                 |
| Rented privately/other            | 62            | 30  | 0.59      | (0.37 to 0.92) | 64             | 6  | 1.55       | (0.65 to 3.73)  |
| Rented from council               | 675           | 236 | 0.42      | (0.35 to 0.51) | 323            | 40 | 2.05       | (1.35 to 3.12)  |
| <b>Social support</b>             |               |     |           |                |                |    |            |                 |
| Other adults in home              | 968           | 602 |           |                | 1030           | 68 |            |                 |
| No other adults                   | 368           | 173 | 0.76      | (0.61 to 0.93) | 271            | 35 | 1.96       | (1.27 to 3.00)  |
| <b>Employment</b>                 |               |     |           |                |                |    |            |                 |
| Working                           | 271           | 386 |           |                | 657            | 34 |            |                 |
| Retired                           | 474           | 270 | 0.40      | (0.32 to 0.50) | 527            | 42 | 1.54       | (0.97 to 2.46)  |
| Unable to work                    | 504           | 76  | 0.11      | (0.08 to 0.14) | 38             | 16 | 8.14       | (4.13 to 16.03) |
| Unemployed                        | 122           | 66  | 0.38      | (0.27 to 0.53) | 130            | 11 | 1.64       | (0.81 to 3.31)  |
| <b>Long-term limiting illness</b> |               |     |           |                |                |    |            |                 |
| No                                | 222           | 420 |           |                | 941            | 23 |            |                 |
| Yes                               | 1182          | 389 | 0.18      | (0.15 to 0.22) | 420            | 82 | 7.99       | (4.96 to 12.86) |

Figure 2: Kaplan Meier survival plots comparing: (a) resilient versus non-resilient; (b) vulnerable versus non-vulnerable groups.



Dotted lines indicate 95% confidence intervals

only

**Table 2: Hazard ratios (HR) and 95% confidence intervals (CI) for ten-year mortality amongst vulnerable and resilient groups**

| Cause of death      | Deaths n (%) |               | Resilient group            |                                   |                                   | Deaths n (%) |                | Vulnerable group           |                                   |                                   |
|---------------------|--------------|---------------|----------------------------|-----------------------------------|-----------------------------------|--------------|----------------|----------------------------|-----------------------------------|-----------------------------------|
|                     | Resilient    | Non-resilient | Unadjusted HR (95% CI)     | Adjusted HR <sup>a</sup> (95% CI) | Adjusted HR <sup>b</sup> (95% CI) | Vulnerable   | Non-vulnerable | Unadjusted HR (95% CI)     | Adjusted HR <sup>a</sup> (95% CI) | Adjusted HR <sup>b</sup> (95% CI) |
| All cause mortality | 173 (21.1)   | 454 (31.9)    | <b>0.61 (0.51 to 0.73)</b> | <b>0.67 (0.55 to 0.81)</b>        | <b>0.75 (0.62 to 0.91)</b>        | 35 (32.7)    | 290 (20.9)     | <b>1.73 (1.22 to 2.46)</b> | <b>1.73 (1.20 to 2.49)</b>        | <b>1.45 (1.01 to 2.11)</b>        |
| Circulatory system  | 68 (9.5)     | 184 (16.0)    | <b>0.57 (0.43 to 0.76)</b> | <b>0.67 (0.49 to 0.90)</b>        | 0.79 (0.58 to 1.07)               | 16 (18.2)    | 117 (9.6)      | <b>2.05 (1.22 to 3.45)</b> | <b>2.07 (1.19 to 3.59)</b>        | <b>1.91 (1.08 to 3.38)</b>        |
| Neoplasm            | 52 (7.4)     | 112 (10.4)    | <b>0.71 (0.51 to 0.98)</b> | <b>0.65 (0.46 to 0.92)</b>        | <b>0.64 (0.44 to 0.93)</b>        | 7 (8.9)      | 98 (8.2)       | 1.10 (0.51 to 2.36)        | 1.16 (0.53 to 2.54)               | 0.93 (0.42 to 2.08)               |
| All other causes    | 53 (6.5)     | 158 (11.1)    | <b>0.53 (0.39 to 0.73)</b> | <b>0.63 (0.45 to 0.87)</b>        | 0.77 (0.55 to 1.09)               | 12 (11.2)    | 75 (5.4)       | <b>2.31 (1.25 to 4.24)</b> | <b>2.21 (1.16 to 4.18)</b>        | 1.64 (0.85 to 3.17)               |

Those classified as resilient compared against non-resilient and those classified as vulnerable compared against those non-vulnerable

<sup>a</sup> Adjusted for sex, age group, housing, and employment

<sup>b</sup> Adjusted for sex, age group, housing, employment and long-term limiting illness

Table 3: Specialist (hospital) care use over 10-year follow-up: comparison of resilient and non-resilient groups

|                  | Any outpatient/day case visit |           |             |                       |              | Number of outpatient/day case visits (excluding pts with no visits) |           |          |                |      |
|------------------|-------------------------------|-----------|-------------|-----------------------|--------------|---------------------------------------------------------------------|-----------|----------|----------------|------|
|                  | Non-resilient                 | Resilient | Adjusted    | (95%CI)               | p            | Non-resilient                                                       | Resilient | Adjusted | (95%CI)        | p    |
|                  | N                             | N         | OR†         |                       |              | median                                                              | median    | IRR†     |                |      |
| Medicine         | 840                           | 478       | 1.11        | (0.90 to 1.37)        | 0.34         | 3                                                                   | 3         | 1.07     | (0.86 to 1.34) | 0.53 |
| Surgical         | 1010                          | 593       | 0.97        | (0.77 to 1.23)        | 0.82         | 4                                                                   | 4         | 0.96     | (0.82 to 1.12) | 0.61 |
| Musculoskeletal  | 204                           | 89        | 0.95        | (0.69 to 1.30)        | 0.74         | 4                                                                   | 4         | 1.11     | (0.71 to 1.75) | 0.65 |
| Oncology         | 147                           | 83        | 1.01        | (0.72 to 1.42)        | 0.93         | 5                                                                   | 5         | 1.05     | (0.65 to 1.72) | 0.83 |
| Anaesthetics     | 107                           | 26        | <b>0.46</b> | <b>(0.27 to 0.79)</b> | <b>0.002</b> | 3                                                                   | 2         | 1.07     | (0.44 to 2.56) | 0.89 |
| Psychiatry       | 155                           | 73        | 1.03        | (0.72 to 1.47)        | 0.89         | 3                                                                   | 2         | 0.85     | (0.42 to 1.72) | 0.65 |
| All              | 1211                          | 720       | 1.21        | (0.90 to 1.64)        | 0.21         | 9                                                                   | 8         | 0.94     | (0.83 to 1.07) | 0.38 |
|                  | Any inpatient days            |           |             |                       |              | Total inpatient days (excluding pts with no visits)                 |           |          |                |      |
|                  | Non-resilient                 | Resilient | Adjusted    | (95%CI)               | p            | Non-resilient                                                       | Resilient | Adjusted | (95%CI)        | p    |
|                  | N                             | N         | OR†         |                       |              | median                                                              | median    | IRR†     |                |      |
| Medicine         | 755                           | 373       | 1.02        | (0.82 to 1.28)        | 0.84         | 19                                                                  | 15        | 1.01     | (0.81 to 1.26) | 0.90 |
| Surgical         | 646                           | 331       | 0.84        | (0.68 to 1.03)        | 0.10         | 7                                                                   | 6         | 0.85     | (0.64 to 1.11) | 0.23 |
| Musculoskeletal‡ | 53                            | 16        | 0.72        | (0.39 to 1.31)        | 0.28         | 12                                                                  | 10        | 0.76     | (0.38 to 1.51) | 0.43 |
| Oncology         | 70                            | 49        | 1.06        | (0.67 to 1.67)        | 0.80         | 11                                                                  | 15        | 1.58     | (0.44 to 5.64) | 0.48 |
| Anaesthetics‡    | 54                            | 17        | 0.76        | (0.42 to 1.36)        | 0.35         | 2                                                                   | 4         | 1.21     | (0.25 to 5.88) | 0.81 |
| Psychiatry‡      | 53                            | 19        | 0.72        | (0.41 to 1.27)        | 0.26         | 47                                                                  | 58        | 1.54     | (0.52 to 4.59) | 0.43 |
| All              | 1017                          | 514       | 0.80        | (0.64 to 1.01)        | 0.06         | 21                                                                  | 17        | 1.06     | (0.86 to 1.30) | 0.60 |

†Analysis adjusted for sex, age, housing, employment, and long term limiting illness; except where rows marked otherwise.

‡ Analysis adjusted for long term limiting illness only.

Table 4: Specialist (hospital) care use over 10-year follow-up: comparison of vulnerable and non-vulnerable groups

|                         | Any outpatient/day case visit |                 |                                      |              |  | Number of outpatient/day case visits (excluding pts with no visits) |                      |                                      |             |  |
|-------------------------|-------------------------------|-----------------|--------------------------------------|--------------|--|---------------------------------------------------------------------|----------------------|--------------------------------------|-------------|--|
|                         | Non-vulnerable<br>N           | Vulnerable<br>N | Adjusted OR <sup>†</sup><br>(95%CI)  | p            |  | Non-vulnerable<br>median                                            | Vulnerable<br>median | Adjusted IRR <sup>†</sup><br>(95%CI) | p           |  |
| <b>Medicine</b>         | 695                           | 55              | 0.79<br>(0.51 to 1.22)               | 0.29         |  | 3                                                                   | 3                    | 0.97<br>(0.58 to 1.64)               | 0.92        |  |
| <b>Surgical</b>         | 1046                          | 73              | 0.68<br>(0.43 to 1.09)               | 0.11         |  | 4                                                                   | 5                    | 1.11<br>(0.79 to 1.56)               | 0.54        |  |
| <b>Musculoskeletal‡</b> | 116                           | 7               | 0.56<br>(0.25 to 1.26)               | 0.16         |  | 4                                                                   | 13                   | 1.48<br>(0.48 to 4.53)               | 0.50        |  |
| <b>Oncology‡</b>        | 139                           | 7               | 0.62<br>(0.28 to 1.38)               | 0.24         |  | 5                                                                   | 10                   | 1.27<br>(0.46 to 3.53)               | 0.65        |  |
| <b>Anaesthetics‡</b>    | 16                            | 4               | 2.45<br>(0.75 to 7.96)               | 0.14         |  | 2                                                                   | 1.5                  | 6.39<br>(0.73 to 55.97)              | 0.09        |  |
| <b>Psychiatry‡</b>      | 107                           | 16              | <b>1.96</b><br><b>(1.06 to 3.61)</b> | <b>0.03</b>  |  | 2                                                                   | 1.5                  | 1.45<br>(0.46 to 4.58)               | 0.52        |  |
| <b>All</b>              | 1238                          | 86              | <b>0.43</b><br><b>(0.25 to 0.75)</b> | <b>0.003</b> |  | 6                                                                   | 8                    | 1.18<br>(0.88 to 1.58)               | 0.27        |  |
|                         | Any inpatient days            |                 |                                      |              |  | Total inpatient days (excluding pts with no visits)                 |                      |                                      |             |  |
|                         | Non-vulnerable<br>N           | Vulnerable<br>N | Adjusted OR <sup>†</sup><br>(95%CI)  | p            |  | Non-vulnerable<br>median                                            | Vulnerable<br>median | Adjusted IRR <sup>†</sup><br>(95%CI) | p           |  |
| <b>Medicine</b>         | 579                           | 56              | 1.1<br>(0.68 to 1.77)                | 0.70         |  | 12                                                                  | 21                   | 1.32<br>(0.84 to 2.07)               | 0.24        |  |
| <b>Surgical</b>         | 569                           | 54              | 1.37<br>(0.89 to 2.12)               | 0.16         |  | 6                                                                   | 7                    | 1.07<br>(0.68 to 1.69)               | 0.76        |  |
| <b>Musculoskeletal‡</b> | 14                            | 2               | 1.05<br>(0.23 to 4.86)               | 0.95         |  | 7.5                                                                 | 9                    | 0.68<br>(0.24 to 1.94)               | 0.47        |  |
| <b>Oncology‡</b>        | 65                            | 5               | 0.92<br>(0.35 to 2.40)               | 0.86         |  | 13                                                                  | 18                   | 0.71<br>(0.24 to 2.04)               | 0.52        |  |
| <b>Anaesthetics‡</b>    | 28                            | 2               | 0.82<br>(0.18 to 3.65)               | 0.80         |  | 3                                                                   | 2                    | <b>0.06</b><br><b>(0.00 to 0.93)</b> | <b>0.04</b> |  |
| <b>Psychiatry‡</b>      | 27                            | 4               | 1.54<br>(0.50 to 4.70)               | 0.45         |  | 123                                                                 | 11.5                 | 0.29<br>(0.09 to 0.98)               | 0.05        |  |
| <b>All</b>              | 865                           | 82              | 1.56<br>(0.92 to 2.67)               | 0.10         |  | 13                                                                  | 19                   | 1.13<br>(0.76 to 1.68)               | 0.56        |  |

<sup>†</sup>Adjusted for sex, age, housing, employment, and long term limiting illness; except where rows marked otherwise.

<sup>‡</sup> Adjusted for long term limiting illness only.

## Appendix 1: Grouping of hospital activity categories

| Pooled categories analysed     | Original specialty group (ISD coding)      |
|--------------------------------|--------------------------------------------|
| <b>Medicine</b>                | General medicine (A1)                      |
|                                | Geriatric medicine (AB)                    |
|                                | Cardiology (A2)                            |
|                                | Endocrinology and diabetes (A8)            |
|                                | Endocrinology (A81)                        |
|                                | Diabetes (A82)                             |
|                                | Gastroenterology (A9)                      |
|                                | Renal medicine (AG)                        |
|                                | Respiratory medicine (AQ)                  |
|                                | Clinical genetics (A3)                     |
|                                | Infectious diseases (A6)                   |
|                                | Dermatology (A7)                           |
|                                | Homeopathy (AC)                            |
|                                | Neurology (AH)                             |
| Rehabilitation medicine (AP)   |                                            |
| GP other than obstetrics (E12) |                                            |
| <b>Surgical</b>                | General surgery (C1)                       |
|                                | General surgery excluding vasc & max (C11) |
|                                | Vascular surgery (C12)                     |
|                                | ENT (C5)                                   |
|                                | Gynaecology (F2)                           |
|                                | Cardiac surgery (C41)                      |
|                                | Thoracic surgery (C42)                     |
|                                | Neurosurgery (C6)                          |
|                                | Plastic surgery (C9)                       |
|                                | Ophthalmology (C7)                         |
|                                | Urology (CB)                               |
|                                | Oral surgery (D3)                          |
|                                | Oral medicine (D4)                         |
|                                | Orthodontics (D5)                          |
| Restorative dentistry (D6)     |                                            |
| <b>Musculoskeletal</b>         | Rheumatology (AR)                          |
|                                | Orthopaedic surgery (C8)                   |
| <b>Oncology</b>                | Medical oncology (AD)                      |
|                                | Clinical oncology (H2)                     |
|                                | Haematology (J4)                           |
| <b>Anaesthetics</b>            | Palliative medicine (AM)                   |
| <b>Psychiatry</b>              | Anaesthetics (C3)                          |
|                                | General psychiatry (G1)                    |
|                                | Forensic psychiatry (G3)                   |
|                                | Psychiatry of old age (G4)                 |
| Learning disability (G5)       |                                            |



### Competing interest declaration

All authors have completed the ICMJE uniform disclosure form at [www.icmje.org/coi\\_disclosure.pdf](http://www.icmje.org/coi_disclosure.pdf) and declare: no support from any organisation for the submitted work; no financial relationships with any organisations that might have an interest in the submitted work in the previous three years; no other relationships or activities that could appear to have influenced the submitted work.

### Author Contribution

AME and PCH planned and designed the paper. AME and CDB conducted the analysis. AME produced the first draft of the paper. CDB and PCH read and commented on the paper. All authors had full access to all of the data (including statistical reports and tables) in the study and can take responsibility for the integrity of the data and the accuracy of the data analysis. All authors have seen and approved the final version of the paper. AME is the guarantor of the paper. She accepts full responsibility for the conduct of the study.

### Funding

This work was supported by a project grant from the Chief Scientist Office, Scottish Executive, grant number CZG/2/287. The research team worked independently. The funders had no role in: the study design; data collection; analysis; interpretation of data; writing of the report; or the decision to submit the article for publication.

### Ethical approval

The study was approved by the Privacy Advisory Committee of NHS National Services, Scotland. Grampian Research Ethics Committee approved the original questionnaire survey and

1 subsequently confirmed that ethical approval was not required for the new linkage since no  
2  
3 information was being collected from participants and the linked dataset was anonymised.  
4  
5  
6  
7

### 8 **Data sharing**

9  
10 Patient level data from the linked dataset could be made available from the corresponding  
11  
12 author when relevant. Informed consent was not obtained because the presented data are  
13  
14 completely anonymous.  
15  
16  
17

### 18 **Copyright**

19  
20 The Corresponding Author has the right to grant on behalf of all authors and does grant on behalf  
21  
22 of all authors, a worldwide licence to the Publishers and its licensees in perpetuity, in all forms,  
23  
24 formats and media (whether known now or created in the future), to i) publish, reproduce,  
25  
26 distribute, display and store the Contribution, ii) translate the Contribution into other languages,  
27  
28 create adaptations, reprints, include within collections and create summaries, extracts and/or,  
29  
30 abstracts of the Contribution, iii) create any other derivative work(s) based on the Contribution,  
31  
32 iv) to exploit all subsidiary rights in the Contribution, v) the inclusion of electronic links from the  
33  
34 Contribution to third party material where-ever it may be located; and, vi) licence any third party  
35  
36 to do any or all of the above.  
37  
38  
39  
40  
41  
42  
43  
44  
45  
46

### 47 **Corresponding author statement**

48  
49 The Corresponding Author has the right to grant on behalf of all authors and does grant on behalf  
50  
51 of all authors, an exclusive licence (or non exclusive for government employees) on a worldwide  
52  
53 basis to the BMJ Publishing Group Ltd to permit this article (if accepted) to be published in BMJ  
54  
55 editions and any other BMJ PGL products and sublicences such use and exploit all subsidiary  
56  
57 rights, as set out in our licence.  
58  
59  
60

Figure 1: Flow chart depicting study process

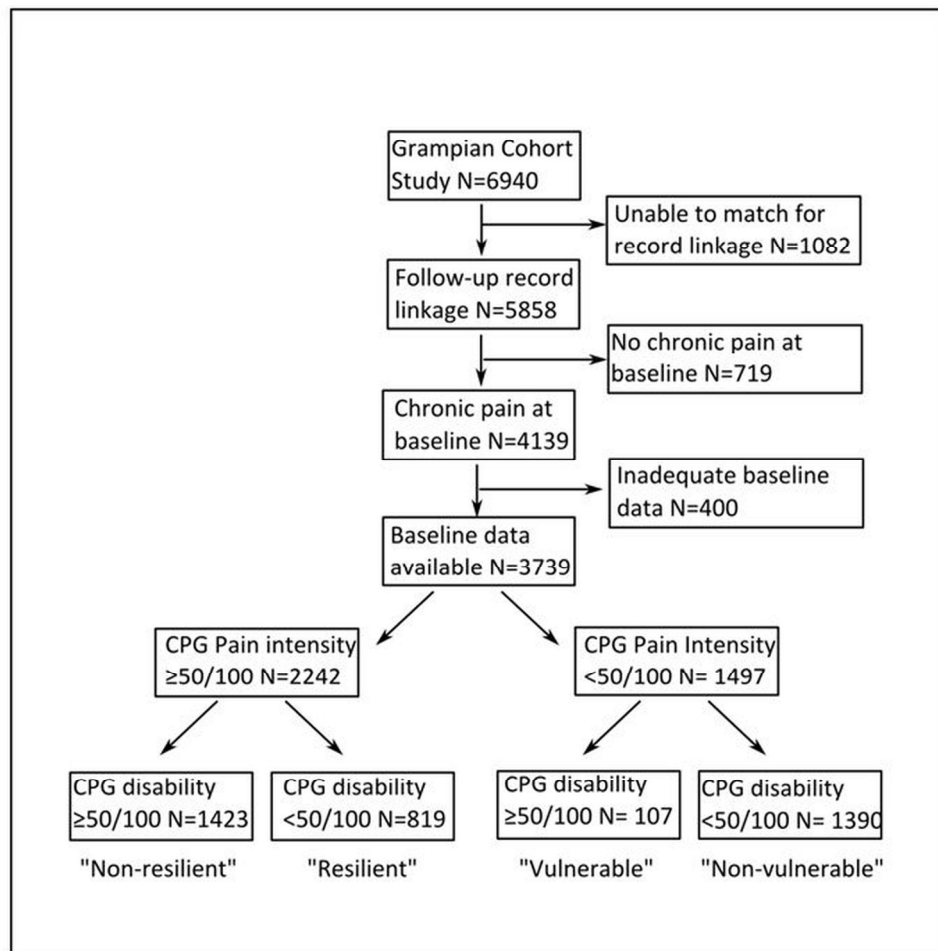

190x203mm (300 x 300 DPI)

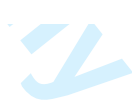

1  
2  
3  
4  
5  
6  
7  
8  
9  
10  
11  
12  
13  
14  
15  
16  
17  
18  
19  
20  
21  
22  
23  
24  
25  
26  
27  
28  
29  
30  
31  
32  
33  
34  
35  
36  
37  
38  
39  
40  
41  
42  
43  
44  
45  
46  
47  
48  
49  
50  
51  
52  
53  
54  
55  
56  
57  
58  
59  
60

Figure 2: Kaplan Meier survival plots comparing: (a) resilient versus non-resilient; (b) vulnerable versus non-vulnerable groups.

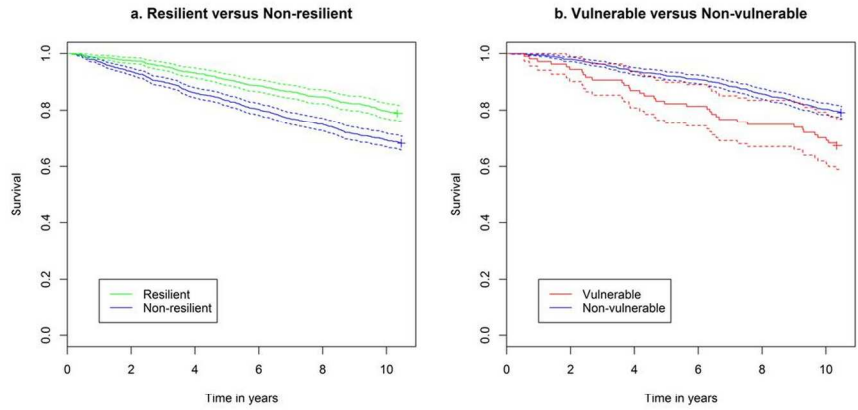

Dotted lines indicate 95% confidence intervals

318x172mm (300 x 300 DPI)

review only

## Appendix 1: Grouping of hospital activity categories

| Pooled categories analysed     | Original specialty group (ISD coding)      |
|--------------------------------|--------------------------------------------|
| <b>Medicine</b>                | General medicine (A1)                      |
|                                | Geriatric medicine (AB)                    |
|                                | Cardiology (A2)                            |
|                                | Endocrinology and diabetes (A8)            |
|                                | Endocrinology (A81)                        |
|                                | Diabetes (A82)                             |
|                                | Gastroenterology (A9)                      |
|                                | Renal medicine (AG)                        |
|                                | Respiratory medicine (AQ)                  |
|                                | Clinical genetics (A3)                     |
|                                | Infectious diseases (A6)                   |
|                                | Dermatology (A7)                           |
|                                | Homeopathy (AC)                            |
| Neurology (AH)                 |                                            |
| Rehabilitation medicine (AP)   |                                            |
| GP other than obstetrics (E12) |                                            |
| <b>Surgical</b>                | General surgery (C1)                       |
|                                | General surgery excluding vasc & max (C11) |
|                                | Vascular surgery (C12)                     |
|                                | ENT (C5)                                   |
|                                | Gynaecology (F2)                           |
|                                | Cardiac surgery (C41)                      |
|                                | Thoracic surgery (C42)                     |
|                                | Neurosurgery (C6)                          |
|                                | Plastic surgery (C9)                       |
|                                | Ophthalmology (C7)                         |
|                                | Urology (CB)                               |
|                                | Oral surgery (D3)                          |
|                                | Oral medicine (D4)                         |
| Orthodontics (D5)              |                                            |
| Restorative dentistry (D6)     |                                            |
| <b>Musculoskeletal</b>         | Rheumatology (AR)                          |
|                                | Orthopaedic surgery (C8)                   |
| <b>Oncology</b>                | Medical oncology (AD)                      |
|                                | Clinical oncology (H2)                     |
|                                | Haematology (J4)                           |
| <b>Anaesthetics</b>            | Palliative medicine (AM)                   |
| <b>Anaesthetics</b>            | Anaesthetics (C3)                          |
| <b>Psychiatry</b>              | General psychiatry (G1)                    |
|                                | Forensic psychiatry (G3)                   |
|                                | Psychiatry of old age (G4)                 |
|                                | Learning disability (G5)                   |

1  
2  
3  
4  
5  
6  
7  
8  
9  
10  
11  
12  
13  
14  
15  
16  
17  
18  
19  
20  
21  
22  
23  
24  
25  
26  
27  
28  
29  
30  
31  
32  
33  
34  
35  
36  
37  
38  
39  
40  
41  
42  
43  
44  
45  
46  
47  
48  
49  
50  
51  
52  
53  
54  
55  
56  
57  
58  
59  
60

For peer review only
